# Supplementary material for: Effectiveness of combined exercise in people with type 2 diabetes and concurrent overweight/obesity: a systematic review and meta-analysis
Source: PubMed Central journal article supplement — BMJ Open. 2021 Oct 6;11(10):e046252. doi: 10.1136/bmjopen-2020-046252 (PMC8496382; doi:10.1136/bmjopen-2020-046252), 2021-10-06
Supplement: bmjopen-2020-046252.draft_revisions.pdf [file bmjopen-2020-046252.draft_revisions.pdf]

# BMJ Open

BMJ Open is committed to open peer review. As part of this commitment we make the peer review history of every article we publish publicly available.

When an article is published we post the peer reviewers' comments and the authors' responses online. We also post the versions of the paper that were used during peer review. These are the versions that the peer review comments apply to.

The versions of the paper that follow are the versions that were submitted during the peer review process. They are not the versions of record or the final published versions. They should not be cited or distributed as the published version of this manuscript.

BMJ Open is an open access journal and the full, final, typeset and author-corrected version of record of the manuscript is available on our site with no access controls, subscription charges or pay-per-view fees (<http://bmjopen.bmj.com>).

If you have any questions on BMJ Open's open peer review process please email [info.bmjopen@bmj.com](mailto:info.bmjopen@bmj.com)

# BMJ Open

## Effectiveness of combined exercise on overweight or obese type 2 diabetes: a systematic review and meta-analysis

|                               |                                                                                                                                                                                                                        |
|-------------------------------|------------------------------------------------------------------------------------------------------------------------------------------------------------------------------------------------------------------------|
| Journal:                      | <i>BMJ Open</i>                                                                                                                                                                                                        |
| Manuscript ID                 | bmjopen-2020-046252                                                                                                                                                                                                    |
| Article Type:                 | Original research                                                                                                                                                                                                      |
| Date Submitted by the Author: | 24-Oct-2020                                                                                                                                                                                                            |
| Complete List of Authors:     | zhao, xiaoyan; The Eighth Affiliated Hospital of Sun Yat-Sen University, He, Qianyu; Sun Yat-Sen University<br>Zeng, Yongmei; Third Affiliated Hospital of Sun Yat-Sen University<br>Cheng, Li; Sun Yat-Sen University |
| Keywords:                     | General diabetes < DIABETES & ENDOCRINOLOGY, MEDICAL EDUCATION & TRAINING, PUBLIC HEALTH                                                                                                                               |
|                               |                                                                                                                                                                                                                        |

SCHOLARONE™  
Manuscripts

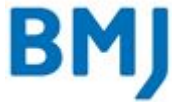

I, the Submitting Author has the right to grant and does grant on behalf of all authors of the Work (as defined in the below author licence), an exclusive licence and/or a non-exclusive licence for contributions from authors who are: i) UK Crown employees; ii) where BMJ has agreed a CC-BY licence shall apply, and/or iii) in accordance with the terms applicable for US Federal Government officers or employees acting as part of their official duties; on a worldwide, perpetual, irrevocable, royalty-free basis to BMJ Publishing Group Ltd ("BMJ") its licensees and where the relevant Journal is co-owned by BMJ to the co-owners of the Journal, to publish the Work in this journal and any other BMJ products and to exploit all rights, as set out in our [licence](#).

The Submitting Author accepts and understands that any supply made under these terms is made by BMJ to the Submitting Author unless you are acting as an employee on behalf of your employer or a postgraduate student of an affiliated institution which is paying any applicable article publishing charge ("APC") for Open Access articles. Where the Submitting Author wishes to make the Work available on an Open Access basis (and intends to pay the relevant APC), the terms of reuse of such Open Access shall be governed by a Creative Commons licence – details of these licences and which [Creative Commons](#) licence will apply to this Work are set out in our licence referred to above.

Other than as permitted in any relevant BMJ Author's Self Archiving Policies, I confirm this Work has not been accepted for publication elsewhere, is not being considered for publication elsewhere and does not duplicate material already published. I confirm all authors consent to publication of this Work and authorise the granting of this licence.

1  
2  
3  
4 **Title page**  
5  
6  
7  
8

9 **Title.** Effectiveness of combined exercise on overweight or obese type 2 diabetes: a systematic  
10 review and meta-analysis  
11  
12

13  
14 **Authors.** Xiaoyan Zhao<sup>a</sup>, Qianyu He<sup>b</sup>, Yongmei Zeng<sup>c</sup>, Li Cheng<sup>b\*</sup>  
15  
16

17 <sup>a</sup> The Eighth Affiliated Hospital, Sun Yat-sen University, Shenzhen, China.  
18

19 <sup>b</sup> School of Nursing, Sun Yat-sen University, Guangzhou, China.  
20  
21

22 <sup>c</sup> The Third Affiliated Hospital, Sun Yat-sen University, Guangzhou, China.  
23

24 \*Corresponding author, No. 74, 2nd Yat-sen Road, Yuexiu District, Guangzhou, Guangdong,  
25 China. Tel: +86-020-87335693; Fax: +86-020-87333043; Email: [chengli5@mail.sysu.edu.cn](mailto:chengli5@mail.sysu.edu.cn)  
26  
27  
28  
29  
30  
31

32 **Keywords.** Diabetes, Type 2; Combined exercise; Obese; Overweight.  
33  
34

35 **Word count.** 2,961  
36  
37  
38  
39  
40  
41  
42  
43  
44  
45  
46  
47  
48  
49  
50  
51  
52  
53  
54  
55  
56  
57  
58  
59  
60

## Abstract

**Objective.** To synthesize the available scientific evidence on the effects of combined exercise on glycemic control, weight loss, insulin sensitivity, blood pressure, and serum lipids among overweight/obese patients with type 2 diabetes (T2D). **Design and Sample.** Relevant literature was retrieved from seven electronic databases to identify randomized controlled trials (RCTs) that reported the effects of combined exercise in overweight/obese individuals with T2D.

**Methods.** The mean difference (MD) with its corresponding 95% confidence interval (CI) was used to estimate the effect size. Meta-analysis was performed using Review Manager 5.3.

**Results.** A total of 10 RCTs with 978 participants were included in the meta-analysis. Pooled results demonstrated that combined exercise significantly reduced the concentration of hemoglobin A1c (MD=-0.16%, 95%CI: -0.28 to -0.05, P=0.006); body mass index (MD=-0.98 kg/m<sup>2</sup>, 95%CI: -1.41 to -0.56, P<0.001); homeostasis model assessment of insulin resistance (MD=-1.19, 95%CI: -1.93 to -0.46, P=0.001); serum insulin (MD=-2.18 µIU/mL, 95%CI: -2.99 to -1.37, P<0.001); and diastolic blood pressure (MD=-3.24 mmHg, 95%CI: -5.32 to -1.16, P=0.002). **Conclusions.** Combined exercise exerted significant effects in improving glycemic control, influencing weight loss, and enhancing insulin sensitivity among overweight/obese patients with T2D.

## Strengths and limitations of this study

► To our knowledge, this is the first systematic review and meta-analysis of RCTs investigating the effects of combined exercise on overweight/obese patients with T2D.

- 1  
2  
3  
4 ▶ A total of seven electronic databases were searched to provide a comprehensive range of  
5  
6 studies.  
7  
8  
9 ▶ This study reports data on a range of factors including glycemic control, insulin sensitivity,  
10  
11 weight loss, BP, and serum lipids, thereby providing a detailed comparison of the effects of  
12  
13 combined exercise.  
14  
15  
16 ▶ Most included studies did not estimate the exercise adherence objectively, which is a vital  
17  
18 variable to evaluate the implementation of exercise interventions.  
19  
20  
21 ▶ Although we performed subgroup analyses, the subgroup of <150 min/week in exercise  
22  
23 duration and the subgroups of 3 weeks and 52 weeks in exercise intervention time were  
24  
25 addressed in only one study, which may have caused the deviation of results.  
26  
27  
28  
29  
30  
31

## 32 **Introduction**

33  
34  
35 The number of patients with diabetes is increasing globally, with an estimated 463 million  
36  
37 adults diagnosed with diabetes. This number is predicted to exceed 700 million by 2045.<sup>1</sup> Type 2  
38  
39 diabetes (T2D), characterized by hyperglycemia resulting from hyposecretion of insulin and/or  
40  
41 insulin resistance, accounts for nearly 90% of all types of diabetes.<sup>1</sup> Propelling the surge of  
42  
43 diabetes is the growing prevalence of overweight and obesity. Data from the World Health  
44  
45 Organization<sup>2</sup> shows that nearly 2 billion adults are overweight and more than half a billion  
46  
47 worldwide are obese. Furthermore, obesity accounts for 50.9–98.6% of adults with T2D in  
48  
49 Europe and 56.1% in Asia.<sup>3</sup> Overweight and obesity contribute to the increasing development of  
50  
51 cardiovascular disease (CVD), cancer, T2D, hypertension, dyslipidemia, and mental health  
52  
53  
54  
55  
56  
57  
58  
59  
60

1  
2  
3  
4 disorders. The coexistence of excess body weight and diabetes further aggravates the quality of  
5  
6 life of individuals and imposes a tremendous burden on the healthcare system. Although there  
7  
8 are several available treatment options targeting individuals with either T2D or excess weight,  
9  
10 not many options are available for those with T2D and overweight/obesity. Measures to support  
11  
12 individuals to optimize glycemic control and weight management remain elusive.  
13  
14  
15

16  
17 Physical activity (defined as all body movement that increase energy use) and exercise  
18  
19 (defined as a structured form of physical activity)<sup>4</sup> have been recommended as the key  
20  
21 components of lifestyle management for patients with T2D and overweight/obesity. Compelling  
22  
23 evidence shows that aerobic exercise has an active effect on receptor affinity (adipose tissue,  
24  
25 skeletal muscle, and insulin receptors), thereby inducing insulin sensitivity and glucose  
26  
27 homeostasis.<sup>1 5 6</sup> Resistance exercise can enhance muscle strength, which in turn improves  
28  
29 insulin sensitivity and muscle rehabilitation.<sup>5 6</sup> Current national and international guidelines  
30  
31 recommend that people with diabetes should perform combined exercise, which integrates both  
32  
33 aerobic (at least 150 min per week of moderate-vigorous aerobic activities) and resistance  
34  
35 exercise (two sessions per week at least 60 min).<sup>6</sup> However, in reality, the adoption rate of the  
36  
37 combined exercise is quite low, and the combined modes have the potential to become  
38  
39 excessively burdensome. Moreover, it remains unclear whether the combined exercise modes  
40  
41 can exert benefits on glycemic control and body weight among individuals with T2D and  
42  
43 overweight/obesity.  
44  
45  
46  
47  
48  
49  
50  
51  
52

53 Therefore, the aim of this systematic review and meta-analysis is to synthesize the best  
54  
55 available evidence and explore the effectiveness of combined exercise on glycemic control,  
56  
57  
58  
59  
60

1  
2  
3  
4 weight loss, insulin sensitivity blood pressure (BP), and serum lipids among overweight/obese  
5  
6 T2D patients.  
7  
8  
9  
10

## 11 **Materials and Methods**

### 12 **Inclusion and exclusion criteria**

13  
14  
15 *Eligibility was defined according to the PICO's (Patient, Intervention, Comparison, Outcome)*

#### 16 *framework:*

##### 17 *Type of participants:*

18  
19  
20  
21  
22 (1) T2D patients aged  $\geq 18$  years; (2) overweight or obesity was indicated by body mass  
23  
24 index (BMI) ( $\text{BMI} \geq 25 \text{ kg/m}^2$  for Caucasians or  $\text{BMI} \geq 23 \text{ kg/m}^2$  for Asian subjects).<sup>7</sup>  
25  
26  
27  
28

##### 29 *Type of intervention and comparison:*

30  
31  
32 (1) included an intervention group of combined form of exercise, which included both  
33  
34 aerobic (e.g., jogging, running, cycling, brisk walking) and resistance (e.g., push-ups, abdominal  
35  
36 crunch, chest press, leg press, squats knee extensions) exercise with predefined intensity,  
37  
38 frequency, and duration; (2) exercise intervention time  $\geq 3$  weeks;<sup>7</sup> and (3) potential comparison  
39  
40 groups included placebo, any format of exercise intervention, or usual care.  
41  
42  
43  
44

##### 45 *Outcomes:*

46  
47  
48 Primary outcomes included hemoglobin A1c (HbA1c) and BMI at the data collection  
49  
50 timepoint. Secondary outcomes included serum insulin, homeostasis model assessment of insulin  
51  
52 resistance (HOMA-IR), systolic blood pressure (SBP), diastolic blood pressure (DBP),  
53  
54 triglycerides (TG), total cholesterol (TC), high-density lipoprotein cholesterol (HDL-C), low-  
55  
56  
57  
58  
59  
60



1  
2  
3  
4 density lipoprotein cholesterol (LDL-C), or psycho-behavioral outcomes such as exercise  
5  
6 performance, muscle strength or performance, exercise adherence, exercise self-efficacy,  
7  
8 emotional well-being, anxiety, depression, and objective measures (e.g., pedometers or  
9  
10 accelerometers).  
11  
12

13  
14 *Type of studies:*  
15

16  
17 Randomized controlled trials (RCTs).  
18

19  
20 *Exclusion criteria:*  
21

22 Studies were excluded if (1) participants were diagnosed with type 1 diabetes or gestational  
23  
24 diabetes; (2) participants suffered from severe complications that impeded exercise engagement,  
25  
26 such as acute infection, diabetic foot, diabetes ketoacidosis, severe hepatorenal insufficiency,  
27  
28 diabetic retinopathy, or obstacle of limb movement; (3) vague description of exercise  
29  
30 intervention in terms of time and type; and (4) full texts were not available.  
31  
32  
33

34  
35 **Search strategy and literature selection**  
36

37 The literature retrieval was performed in major English and Chinese electronic databases,  
38  
39 including PubMed, EMBASE, Web of Science, the Cochrane library, WANFANG, CNKI, and  
40  
41 SinoMed from inception through April 2020. The reference lists of eligible publications were  
42  
43 also retrieved to identify additional eligible studies. Keywords with the combination of medical  
44  
45 subject heading terms were used in the search strategy: aerobic, exercise, training, isometric  
46  
47 exercise, physical activity, physical exercise, resistance, strength training, strength exercise,  
48  
49 weight lifting, weight bearing, combined exercise, diabetes, DM, T2D, NIDDM, overweight,  
50  
51 obese, obesity, body mass index, BMI, body weight, and adiposity. After removing duplicate  
52  
53  
54  
55  
56  
57  
58  
59  
60

1  
2  
3  
4 records, two reviewers independently selected potential articles by assessing titles and abstracts.  
5  
6 Then, full texts were further screened to identify the eligibility; at this stage, the two reviewers  
7  
8 checked whether the participants were human subjects with T2D and overweight/obese instead  
9  
10 of animal model studies or people without T2D and overweight/obesity, and they eliminated  
11  
12 articles that had no desired results shown in the inclusion criteria. Any disagreements or  
13  
14 discrepancies regarding the selection of potential studies were resolved through discussion, and a  
15  
16 third reviewer was consulted in case of any disagreement.  
17  
18  
19  
20  
21

### 22 **Data extraction**

23  
24 Two reviewers independently extracted details of the included studies using a structured  
25  
26 data extraction form, including the study design, sample size, exercise intervention details, data  
27  
28 collection time points, participant characteristics, and outcomes (Table 1). Any disagreements or  
29  
30 discrepancies regarding data extraction were resolved through discussion, and a third reviewer  
31  
32 was consulted in case of any disagreement.  
33  
34  
35  
36  
37

### 38 **Quality assessment**

39  
40 The risk of bias of included studies was assessed using the Cochrane Collaboration's Risk  
41  
42 of Bias assessment tool.<sup>9</sup> The quality of studies was judged to be with low, unclear, or high risk  
43  
44 of bias.  
45  
46  
47

### 48 **Data analysis**

49  
50 All analyses were performed using RevMan5.3 (Cochrane Collaboration,  
51  
52 <http://ims.cochrane.org/revman>). Heterogeneity was assessed using Cochran's Q statistic and I<sup>2</sup>-  
53  
54 test. A random effect model was applied to calculate the pooled results if I<sup>2</sup>≥50%; otherwise, a  
55  
56  
57  
58  
59  
60

1  
2  
3  
4 fixed effect model was used. Subgroup analyses on primary outcomes stratified by exercise  
5  
6 duration per week, exercise frequency, and the time of exercise intervention were conducted,  
7  
8 respectively. The mean difference (MD) with its corresponding 95% confidence interval (CI)  
9  
10 was used to calculate the effect size. A two-sided  $p < 0.05$  was considered to indicate statistical  
11  
12 significance.  
13  
14

### 15 16 17 **Patient and public involvement**

18  
19 No patient involved.  
20  
21  
22

### 23 24 25 **Results**

#### 26 27 **Search outcome**

28  
29 A total of 10,342 records were identified. After duplicate deletion, 8,140 articles were  
30  
31 screened for titles and abstracts, and 50 articles were further screened for full-text. Finally, 10  
32  
33 studies were deemed eligible and included in this meta-analysis (Figure 1).  
34  
35

36  
37 An overview of the characteristics of included studies is summarized in Table 1. Across the  
38  
39 included studies, the sample size ranged from 20 to 606; the intervention duration ranged from 3  
40  
41 to 52 weeks; the mean (SD) age of participants was similar across the included studies (range:  
42  
43 53.6 [9.1]–66.6 [7.5]) years; the mean (SD) HbA1c ranged from 6.44 (0.33) to 9.50 (0.90); and  
44  
45 the mean (SD) BMI ranged from 28.15 (3.72) to 39.9 (7.3)  $\text{kg}/\text{m}^2$ .  
46  
47  
48

#### 49 50 51 **Quality of the included studies**

52  
53 Figure 2 shows the quality assessment of the included studies: six studies were judged to  
54  
55 have a low risk of bias,<sup>11 12 13 16 17 18</sup> while the remaining four studies showed uncertain risk of  
56  
57  
58

**Table 1.** characteristics of the included studies.

| Author<br>Year    | Country | Sample size<br>(EX/CON) | Combined exercise intervention                                                                                                   |                             |                                                                                                                                                                                                                                    |                                                                  |                          |                               |                                |                                                                                                                                                                                                                                                                                                                                                                           | Control | Time<br>points of<br>data<br>collection<br>(week) | Participant characteristics       |                                       |                                 | Dropout<br>rate<br>(%) | Outcomes                                                              | Adverse events                                                                                                         |
|-------------------|---------|-------------------------|----------------------------------------------------------------------------------------------------------------------------------|-----------------------------|------------------------------------------------------------------------------------------------------------------------------------------------------------------------------------------------------------------------------------|------------------------------------------------------------------|--------------------------|-------------------------------|--------------------------------|---------------------------------------------------------------------------------------------------------------------------------------------------------------------------------------------------------------------------------------------------------------------------------------------------------------------------------------------------------------------------|---------|---------------------------------------------------|-----------------------------------|---------------------------------------|---------------------------------|------------------------|-----------------------------------------------------------------------|------------------------------------------------------------------------------------------------------------------------|
|                   |         |                         | Exercise format                                                                                                                  | Supervision/<br>Facilitator | Exercise type                                                                                                                                                                                                                      | Intensity                                                        | Frequency<br>(Days/week) | Duration<br>/session<br>(min) | Intervention<br>time<br>(week) | Age<br>(year)                                                                                                                                                                                                                                                                                                                                                             |         |                                                   | BMI<br>(kg/m <sup>2</sup> )       | T2D<br>duration<br>(years)            |                                 |                        |                                                                       |                                                                                                                        |
| AminiLari<br>2017 | Iran    | 30<br>(15/15)           | Center-based and group-based:<br>each exercise session consisted of three phases--warm up, the main stage and a cool-down period | NR/NR                       | AE: cycle ergometer<br>RE: leg extension, prone leg curl, abdominal crunch                                                                                                                                                         | AE:<br>50%-55% of<br>HR <sub>max</sub><br>RE:<br>50%-55% 1<br>RM | 3                        | 45-70                         | 12                             | NR                                                                                                                                                                                                                                                                                                                                                                        |         | 0,12                                              | 45-60                             | EX<br>29.01±2.57<br>CON<br>28.15±3.72 | >2                              | 6.67                   | HOMA-IR,<br>BMI                                                       | NR                                                                                                                     |
| Balducci<br>2010a | Italy   | 606<br>(303/303)        | Center-based and group-based: in metabolic fitness center                                                                        | Yes/Exercise specialist     | AE: treadmill, step, elliptical, cycle ergometer<br>RE: 4 resistance exercises (eg, chest press, lateral pull down, leg press, trunk flexion for the abdominals) and 3 stretching position<br>standard care: same as control group | Low~high intensity                                               | 2                        | 75                            | 48                             | Standard care (counseling and diet management)<br>Counseling: encouraging any type of commuting, occupational, home and leisure time physical activity, counseling was reinforced every 3 months;<br>Diet management: caloric intake reduction, adherence to diet was verified by using food diaries, and dietary prescriptions were adjusted at each intermediate visit. |         | 0,48                                              | EX<br>58.8±8.6<br>CON<br>58.8±8.5 | EX<br>31.2±4.6<br>CON<br>31.9±4.6     | 6(3-10)                         | 7.10                   | HbA1c,<br>HOMA-IR,<br>SBP, DBP,<br>TG, TC,<br>HDL-C,<br>LDL-C,<br>BMI | Shoulder pain,<br>low back pain,<br>Aggravation of<br>pre-existing<br>osteoarthritis,<br>musculoskeletal<br>discomfort |
| Balducci<br>2010b | Italy   | 42<br>(22/20)           | Center-based and group-based: NR                                                                                                 | Yes/NR                      | AE: treadmill, cycloergometer<br>RE: 4 resistance exercises (eg, chest press, lateral pull down, leg press, trunk flexion for the abdominals) and 3 stretching position<br>Dietary prescriptions                                   | AE:<br>70-80%<br>VO <sub>2max</sub><br>RE:<br>80% 1 RM           | 2                        | 60                            | 48                             | Dietary prescriptions                                                                                                                                                                                                                                                                                                                                                     |         | 0,12,24,<br>36,48                                 | EX<br>60.6±9.3<br>CON<br>61.1±7.1 | EX<br>30.5±0.9<br>CON<br>30.9±1.1     | EX<br>8.5±5.7<br>CON<br>7.8±5.2 | 4.76                   | HbA1c,<br>HOMA-IR,<br>SBP, DBP,<br>TG, TC,<br>HDL-C,<br>LDL-C,<br>BMI | Musculo-<br>skeletal injury                                                                                            |

| Author<br>Year   | Design<br>Country | Sample size<br>(EX/CON) | Exercise intervention                                                                                                                                                                                                                                                                                                |                             |                                                                                                                                                                 |                                       |                                |                                    |                                                               | Control                                                                                      | Time<br>points of<br>data<br>collection<br>(week) | Participants characteristics      |                                   |                                                 | Dropout<br>rate<br>(%) | Outcomes                                             | Adverse events                                       |
|------------------|-------------------|-------------------------|----------------------------------------------------------------------------------------------------------------------------------------------------------------------------------------------------------------------------------------------------------------------------------------------------------------------|-----------------------------|-----------------------------------------------------------------------------------------------------------------------------------------------------------------|---------------------------------------|--------------------------------|------------------------------------|---------------------------------------------------------------|----------------------------------------------------------------------------------------------|---------------------------------------------------|-----------------------------------|-----------------------------------|-------------------------------------------------|------------------------|------------------------------------------------------|------------------------------------------------------|
|                  |                   |                         | Exercise format                                                                                                                                                                                                                                                                                                      | Supervision/<br>Facilitator | Exercise type                                                                                                                                                   | Intensity                             | Frequency<br>(Days/week)       | Duration<br>/session<br>(min)      | Intervention<br>time<br>(week)                                |                                                                                              |                                                   | Age<br>(year)                     | BMI<br>(kg/m <sup>2</sup> )       | T2D<br>duration<br>(years)                      |                        |                                                      |                                                      |
| Bjorgaas<br>2005 | Norway            | 29<br>(15/14)           | Center-based and group-based: each exercise session consisted of three phases--warm up, the main stage, a cool-down and stretching period                                                                                                                                                                            | Yes/Physio-therapist        | AE: light jogging, co-ordination exercises, knee bends and stretching<br>RE: NR<br>Diet information: same as control group                                      | 50-85%<br>HR <sub>max</sub>           | 2                              | 90                                 | 12                                                            | Diet information: a plenary session by a clinical nutritionist                               | 0,12                                              | EX<br>57.9±8.0<br>CON<br>56.9±7.8 | EX<br>31.7±2.6<br>CON<br>31.8±3.0 | EX<br>2.5<br>(0.1-17)<br>CON<br>1.5<br>(0.1-15) | 10.34                  | HbA1c,<br>SBP, DBP                                   | Achilles<br>tendinitis                               |
| Leehey<br>2016   | USA               | 36<br>(18/18)           | Participants underwent 12 weeks of center-based exercise followed by 40 weeks of home-based exercise.<br>Center-based: developing an individualized exercise prescription<br>Home-based and individual-based: patients received weekly phone calls and were encouraged to meet with their trainer on a monthly basis | Yes/ Trainer                | AE: treadmill, elliptical trainer and cycle ergometer<br>RE: using elastic bands, hand-held weights or weight machine<br>Diet management: same as control group | AE:<br>Interval<br>RE:<br>progressive | Center-based<br>exercise:<br>3 | Center-based<br>exercise:<br>80-90 | Home-based<br>exercise:<br>60<br>(3 times)<br>30<br>(6 times) | Diet management: nutritional counseling session at baseline with 9 follow-up telephone calls | 0,12,52                                           | EX<br>65.4±8.7<br>CON<br>66.6±7.5 | EX<br>36.2±4.8<br>CON<br>37.4±4.2 | NR                                              | 11.11                  | HbA1c,<br>SBP,<br>TG, TC,<br>HDL-C,<br>LDL-C,<br>BMI | Cardiovascular<br>disease,<br>cervical<br>myelopathy |

| Author<br>Year  | Design<br>Country | Sample size<br>(EX/CON) | Exercise intervention                       |                             |                                                                                                                                                                                                                                                                                                                      |                                                            |                          |                               |                                | Control                                                                                                                                                                                      | Time<br>points of<br>data<br>collection<br>(week) | Participants characteristics                 |                                      |                            | Dropout<br>rate<br>(%) | Outcomes                                        | Adverse events |
|-----------------|-------------------|-------------------------|---------------------------------------------|-----------------------------|----------------------------------------------------------------------------------------------------------------------------------------------------------------------------------------------------------------------------------------------------------------------------------------------------------------------|------------------------------------------------------------|--------------------------|-------------------------------|--------------------------------|----------------------------------------------------------------------------------------------------------------------------------------------------------------------------------------------|---------------------------------------------------|----------------------------------------------|--------------------------------------|----------------------------|------------------------|-------------------------------------------------|----------------|
|                 |                   |                         | Exercise format                             | Supervision/<br>Facilitator | Exercise type                                                                                                                                                                                                                                                                                                        | Intensity                                                  | Frequency<br>(Days/week) | Duration<br>/session<br>(min) | Intervention<br>time<br>(week) |                                                                                                                                                                                              |                                                   | Age<br>(year)                                | BMI<br>(kg/m <sup>2</sup> )          | T2D<br>duration<br>(years) |                        |                                                 |                |
| Lucotti<br>2011 | Italy             | 50<br>(30/20)           | Center-based and group-based: in a hospital | Yes/<br>Physician           | AE: row ergometer and bicycle ergometer<br>RE: 5 exercises for the upper part of the body (arm curls, military press, push-ups, upright rowing, back extension) and 4 exercises for the lower part of the body (squats knee extensions, heel raises and bent knee sit-ups)<br>Diet management: same as control group | AE:<br>70%<br>HR <sub>max</sub><br>RE:<br>40–50% of<br>1RM | 5                        | 45                            | 3                              | AE plus diet management:<br>AE:<br>70%HR max<br>5days/wk,30min/session;<br>Diet management:<br>hypocaloric<br>diet regime<br>administered<br>under a daily<br>supervision of<br>a dietician. | 0,3                                               | EX<br>61.5±11.5<br>CON<br>58.1±9.9           | EX<br>39.9±7.3<br>CON<br>38.8±4.5    | NR                         | 6.00                   | HbA1c<br>SBP, DBP,<br>TG, TC,<br>HDL-C,<br>BMI  | NR             |
| Vinetti<br>2015 | Italy             | 20<br>(10/10)           | Center-based: in a hospital-based setting   | Yes/<br>Trainer             | AE: cycling on mechanically braked cycle ergometers<br>RE: major muscle groups (upper limb, lower limb, chest, back and core), using calisthenics, repetitions with ankle weights, dumbbells and elastic bands<br>Standard care: same as control group                                                               | AE:<br>Interval<br>RE:<br>progressive                      | NR                       | 55-85                         | 48                             | Standard care: dietary regimen prescribed by the diabetologist                                                                                                                               | 0,48                                              | EX<br>60.56<br>±5.94<br>CON<br>57.5±9.4<br>6 | EX<br>29.65±4.08<br>CON<br>29.2±3.11 | ≥2                         | 0                      | HbA1c,<br>SBP, DBP,<br>TG, TC,<br>HDL-C,<br>BMI | NR             |

Abbreviations: RCT, randomized controlled trial; T2D, type 2 Diabetes; EX, exercise group; CON, control group; AE, aerobic exercise; RE, resistance exercise; NR: not reported; CKD, chronic kidney disease; RM: repetition maximum; HR: heart rate; VO<sub>2max</sub>: maximal oxygen consumption; HbA1c, hemoglobin A1c; HOMA-IR, homeostasis model assessment of insulin resistance; BMI, body mass index; SBP, systolic blood pressure; DBP, diastolic blood pressure; TG, triglycerides; TC, total cholesterol; HDL-C, high-density lipoprotein cholesterol; LDL-C, low-density lipoprotein cholesterol.

1  
2  
3  
4 bias.<sup>10 14 15 19</sup> The following were main sources of bias: lack of blinding of participants and  
5  
6 personnel, absence of random sequence generation and allocation concealment, and incomplete  
7  
8 outcome data. In summary, the quality of the included studies was considered as moderate risk of  
9  
10 bias.  
11  
12

## 13 14 **Pooled results**

### 15 16 17 **(1) Glycemic control (HbA1c)**

18  
19 Nine studies provided data about the effect of combined exercise on HbA1c. The pooled  
20  
21 results showed the combined intervention significantly reduced the HbA1c level of participants,  
22  
23 favoring the intervention group, as compared with the control group (MD=-0.16%, 95%CI: -0.28  
24  
25 to -0.05, P=0.006) (Figure 3).  
26  
27  
28

### 29 30 **(2) Weight loss (BMI)**

31  
32 Eight studies reported changes in BMI. The pooled results showed that combined exercise  
33  
34 significantly reduced BMI in the intervention group than in the control group (MD=-0.98 kg/m<sup>2</sup>,  
35  
36 95%CI: -1.41 to -0.56, P<0.001) (Figure 3).  
37  
38  
39

### 40 41 **(3) Insulin sensitivity (HOMA-IR, serum insulin)**

42  
43 Four of the 10 studies examined the effectiveness of combined exercise on HOMA-IR  
44  
45 index. The pooled result revealed a significant reduction in HOMA-IR index favoring the  
46  
47 intervention group (MD=-1.19, 95%CI: -1.93 to -0.46, P=0.001) (Figure 4).  
48  
49

50  
51 Six studies examined the value of serum insulin. The difference in mean of serum insulin  
52  
53 significantly favored the intervention group (MD=-2.18  $\mu$ IU/mL, 95%CI: -2.99 to -1.37,  
54  
55 P<0.001) (Figure 4).  
56  
57  
58  
59

#### (4) Blood pressure (SBP and DBP)

Eight of the 10 studies measured SBP and seven studies measured DBP. The pooled results showed no difference in SBP between the intervention and control groups (MD=-2.33 mmHg, 95%CI: -6.01 to 1.35, P=0.21); whereas, the result revealed a significant reduction in DBP favoring the intervention group (MD=-3.24 mmHg, 95%CI: -5.32 to -1.16, P=0.002) (Figure 5).

#### (5) Serum lipids (TG, TC, HDL-C, and LDL-C)

Seven studies measured the effectiveness of combined exercise on lipid profiles. The pooled results demonstrated that combined exercise had no significant effect on TG, TC, HDL-C, and LDL-C levels (TG: MD=-7.57 mg/dL, 95%CI: -16.42 to 1.28, P=0.09; TC: MD=-8.29 mg/dL, 95%CI: -22.18 to 5.60, P=0.24; HDL-C: MD= 2.69 mg/dL, 95%CI: -0.72 to 6.10, P=0.12; LDL-C: MD=0.14 mg/dL, 95%CI: -19.87 to 20.14, P=0.99) (Figure 6).

#### Subgroup analysis (exercise duration)

The results demonstrated that the combined exercise for a duration  $\geq 150$  min/week yielded a significant reduction in HbA1c (MD=-0.16%, 95%CI: -0.28 to -0.04, P=0.01) and BMI (MD=-1.35 kg/m<sup>2</sup>, 95%CI: -2.02 to -0.69, P<0.001). The subgroup of <150 min/week favored the intervention group with a lower BMI concentration than the control group (150 min/week: MD=-0.80 kg/m<sup>2</sup>, 95%CI: -1.39 to -0.21, P=0.008) (Table 2).

#### Subgroup analysis (exercise frequency)

The results showed that combined exercise with frequency <3 days/week significantly lowered the HbA1c (MD=-0.31%, 95%CI: -0.50 to -0.13, P<0.001) and BMI (MD=-1.03 kg/m<sup>2</sup>, 95%CI: -1.49 to -0.57, P<0.001) (Table 2).



**Table 2.** Subgroup analyses on primary outcomes

| Subgroups                         |      | HbA1c          |             |             |                     |          |                       | BMI            |             |             |                     |          |                       |
|-----------------------------------|------|----------------|-------------|-------------|---------------------|----------|-----------------------|----------------|-------------|-------------|---------------------|----------|-----------------------|
|                                   |      | Included study | Sample size | Sample size | Mean Difference     | <i>P</i> | <i>I</i> <sup>2</sup> | Included study | Sample size | Sample size | Mean Difference     | <i>P</i> | <i>I</i> <sup>2</sup> |
|                                   |      | (n)            | (EX)        | (CON)       | (95% CI)            |          |                       | (n)            | (EX)        | (CON)       | (95% CI)            |          |                       |
| Exercise duration<br>(min/week)   | <150 | 1              | 22          | 20          | -0.28(-1.01, 0.45)  | 0.45     | /                     | 1              | 22          | 20          | -0.80(-1.39, -0.21) | 0.008    | /                     |
|                                   | ≥150 | 5              | 343         | 341         | -0.27(-0.44, -0.10) | 0.002    | 0%                    | 5              | 345         | 345         | -1.10(-1.76, -0.44) | 0.001    | 0%                    |
| Exercise frequency<br>(days/week) | <3   | 3              | 321         | 306         | -0.31(-0.50, -0.13) | <0.001   | 0%                    | 2              | 310         | 295         | -1.03(-1.49, -0.57) | <0.001   | 36%                   |
|                                   | ≥3   | 3              | 44          | 55          | 0.03(-0.45, 0.51)   | 0.90     | 0%                    | 4              | 57          | 70          | 0.18(-1.34, 1.71)   | 0.81     | 0%                    |
| Intervention time<br>(weeks)      | 3    | 1              | 20          | 27          | 0.40(-0.57, 1.37)   | 0.42     | /                     | 1              | 20          | 27          | 1.10(-2.43, 4.63)   | 0.54     | /                     |
|                                   | 12   | 3              | 47          | 49          | 0.07(-0.49, 0.62)   | 0.81     | 0%                    | 3              | 49          | 53          | -0.29(-0.84, 0.27)  | 0.31     | 0%                    |
|                                   | 48   | 3              | 320         | 305         | -0.31(-0.48, -0.13) | <0.001   | 0%                    | 3              | 320         | 305         | -1.02(-1.47, -0.56) | <0.001   | 0%                    |
|                                   | 52   | 1              | 14          | 18          | 0.50(-0.83, 1.83)   | 0.46     | /                     | 1              | 14          | 18          | -0.40(-4.65, 3.85)  | 0.85     | /                     |

Abbreviations: EX, exercise group; CON, control group; CI = confidence intervals; *I*<sup>2</sup> = I-squared.

### Subgroup analysis (exercise intervention time)

The results showed that combined exercise for 48 weeks significantly reduced the HbA1c (MD=-0.31%, 95%CI: -0.48 to -0.15, P<0.001) and BMI (MD=-1.06 kg/m<sup>2</sup>, 95%CI: -1.52 to -0.62, P<0.001) in the intervention group as compared with the control group. (Table 2).

### Discussion

The results from this meta-analysis showed that combined exercise was associated with a significant decline in HbA1c, BMI, HOMA-IR index, serum insulin, and DBP, indicating the important role of combined exercise in improving glycemic and weight control and enhancing insulin sensitivity among overweight/obese T2D patients. However, at this time, combined exercise had no effect on serum lipids.

Previous meta-analyses of exercise in diabetic patients with/without overweight/obesity have found a positive effect on glycemic control. Hou<sup>20</sup> assessed the effect of combined exercise compared with aerobic exercise among T2D patients. Their results showed a significant reduction of HbA1c by 0.31%, which was consistent with our finding that combined exercise decreased HbA1c by 0.16%. The meta-analysis by Zou<sup>21</sup> identified 13 eligible studies investigating the effect of exercise on obese T2D patients; moreover, the researchers performed subgroup analysis stratified by intervention time, suggesting that longer term exercise (48 weeks) achieved a pronounced reduction in HbA1c by 0.27%, a

1  
2  
3  
4  
5 magnitude similarity with our results that longer term combined exercise (48 weeks)  
6  
7  
8 decreased HbA1c by 0.31%.  
9

10 Our result showed that combined exercise exerted a significant effect on insulin  
11 sensitivity on T2D patients with overweight/obesity, which was in line with the results of  
12  
13 Thaane<sup>22</sup>, wherein exercise appeared to improve insulin sensitivity among T2D adults with  
14  
15  
16  
17  
18  
19  
20  
21  
22  
23  
24  
25  
26  
27  
28  
29  
30  
31  
32  
33  
34  
35  
36  
37  
38  
39  
40  
41  
42  
43  
44  
45  
46  
47  
48  
49  
50  
51  
52  
53  
54  
55  
56  
57  
58  
59  
60

Our result showed that combined exercise exerted a significant effect on insulin sensitivity on T2D patients with overweight/obesity, which was in line with the results of Thaane<sup>22</sup>, wherein exercise appeared to improve insulin sensitivity among T2D adults with overweight/obesity. Way<sup>23</sup> also found that regular exercise had a significant benefit in insulin sensitivity on T2D adults. They concluded this by synthesizing the outcomes of clamps, insulin infusion sensitivity tests, insulin tolerance test, and oral glucose tolerance test. The results of Way<sup>23</sup> indicated that the durability of training-induced improvement in insulin sensitivity could persist beyond 72 h after the last exercise session. However, there was a potential heterogeneity by diverse measurement techniques in insulin sensitivity.

It is generally more difficult for diabetic patients to lose weight and/or maintain weight loss. The results of our study suggested that overweight/obese individuals with T2D who wish to lose weight should engage in combined exercise. Our results showed that combined exercise achieved a pronounced decrease in BMI among overweight/obese adults with T2D. Previous reviews also showed the effect of combined exercise on weight-loss by using other obesity indicators. The review by Hou<sup>20</sup> showed that combined exercise significantly reduced subcutaneous and visceral adipose tissue; the results of Pan<sup>24</sup> showed that combined exercise safely accentuated reduction in body weight; while the results of Thaane<sup>22</sup> suggested that short-term exercise training exerted no significant effect in body weight, BMI, and body fat.

Cardiovascular disease was one of the leading reasons for frequent medical consultation

1  
2  
3  
4  
5 and rehospitalization for adults with T2D and overweight/obesity.<sup>25</sup> BP and serum lipids are  
6  
7  
8 vital risk factors for CVD, and the importance of managing and maintaining blood pressure  
9  
10 and cholesterol levels has been emphasized by the ADA guideline.<sup>26</sup> Evidence has shown the  
11  
12 benefits of simultaneous control of HbA1c, BP, and lipid levels. Our study found that  
13  
14 combined exercise had no effect on SBP and serum lipids, which was contradictory with the  
15  
16 finding of Albalawi<sup>27</sup> and Bersaoui<sup>28</sup>, which reported that combined exercise was related to a  
17  
18 statistically significant decline in BP and lipid control among T2D patients. The possible  
19  
20 reason for the discrepancy may be related to the differences of participants' characteristics. In  
21  
22 the current meta-analysis, participants had T2D and were overweight or obese. Compared  
23  
24 with patients with normal weight, overweight and obese patients were less likely to engage in  
25  
26 self-management activities and maintain therapeutic lifestyles<sup>29</sup>. Hence, T2D patients with  
27  
28 overweight/obesity were more likely to have poor BP and lipid control. More strategies need  
29  
30 to be explored to facilitate patients with T2D and overweight/obesity to simultaneously  
31  
32 manage HbA1c, BP, and cholesterol levels.  
33  
34  
35  
36  
37  
38  
39  
40

41  
42 It is generally well-accepted that increasing the exercise duration per week is associated  
43  
44 with greater long-term health benefits.<sup>30</sup> We found that combined exercise showed a  
45  
46 pronounced benefit on HbA1c and BMI reduction when exercise duration  $\geq 150$  min /week,  
47  
48 which is in line with the finding of Umpierre.<sup>31</sup> Figueira<sup>32</sup> also found that it was beneficial to  
49  
50 perform exercise for  $>150$  min/week to magnify the effect of BP reduction. We also found  
51  
52 that combined exercise exerted a significant effect on weight loss (BMI) when exercise  
53  
54 duration  $<150$  min/week. The plausible explanation would seem to be that weight loss is  
55  
56  
57  
58  
59  
60

1  
2  
3  
4  
5 influenced by various elements such as diet, regular exercise, pharmacologic therapy, and  
6  
7  
8 frequent contact with health professionals.<sup>1 23</sup> Furthermore, the subgroup of <150 min/week  
9  
10 exercise only included one study, which may have caused the deviation of results.  
11  
12

13 Exercise frequency is a major determinant of glycemic control in T2D patients.<sup>33 34</sup> Our  
14  
15 study showed that combined exercise had significant effects on HbA1c and BMI only when  
16  
17 performed <3 days/week. We would attribute such results to fundamental differences  
18  
19 between studies of the subgroups of <3 days/week and  $\geq 3$  days/week. More specifically, most  
20  
21 researches in the subgroup of <3 days/week performed long-term (48 weeks) and supervised  
22  
23 exercise. It is also important to mention that because supervised exercise is associated with  
24  
25 greater improvement of glycemic and weight control,<sup>24</sup> Balducci<sup>11 12</sup> even considered  
26  
27 physical activity counseling and diet adherence, thus making exercise intervention more  
28  
29 efficient. However, in the subgroup of  $\geq 3$  days/week exercise, subjects in some studies<sup>10 17</sup>  
30  
31 performed short-term exercise, which was likely underpowered to detect a difference in  
32  
33 outcomes.  
34  
35  
36  
37  
38  
39  
40  
41

42 Our finding showed that combined exercise for 48 weeks exerted significant effects on  
43  
44 glycemic control and weight loss, which was consistent with the results of Franz,<sup>35</sup> in that  
45  
46 physical activity and/or diet had a beneficial effect on glycemic control and weight loss at 12  
47  
48 months. However, our results revealed that combined exercise for 52 weeks had no effect on  
49  
50 either HbA1c or BMI. A likely explanation is that participants in the subgroup of 52 weeks  
51  
52 suffered from chronic kidney disease and might therefore not exercise effectively, which  
53  
54 could lead to an attenuation of the difference between the intervention and control groups. On  
55  
56  
57  
58  
59  
60

1  
2  
3  
4  
5 the other hand, it is also essential to consider that compliance with exercise regimens would  
6  
7  
8 reduce in the long term, thus reducing the effect of exercise on clinical outcomes.  
9

### 10 **Direction for future research and practice**

11  
12  
13 Considering the benefits of combined exercise, it might be helpful to recommend  
14  
15 combined exercise for T2D patients with overweight/obesity to improve glycemic and weight  
16  
17 control and decrease insulin resistance. We also recommend long exercise duration ( $\geq 150$   
18  
19 min/week) to magnify the effect. Physical activity counseling, psycho-educational  
20  
21 interventions, mobile technologies, and peer support groups could be integrated into the  
22  
23 exercise to improve the adoption rate of combined exercise.<sup>36</sup> Although there are guideline  
24  
25 recommendations for diabetic patients, there is little evidence to indicate the ideal exercise  
26  
27 duration, exercise intensity, and exercise time that would be most appropriate for  
28  
29 overweight/obese T2D patients. Whether frequent exercise and long intervention time of  
30  
31 exercise proves beneficial for overweight/obese patients with T2D requires further  
32  
33 investigation. According to the features of effective exercise interventions on glycemic and  
34  
35 weight control among included studies, most researches performed center-based exercise  
36  
37 with supervision. Hence, we recommend this kind of intervention in future studies to achieve  
38  
39 greater metabolic effects. Objective measures such as pedometers and accelerometers should  
40  
41 be utilized to assess the exercise level more accurately.  
42  
43  
44  
45  
46  
47  
48  
49  
50

### 51 **Conclusions**

52  
53  
54 This systematic review provides useful information for the clinical application of  
55  
56 combined exercise in the management of overweight/obese patients with T2D. The results  
57  
58  
59  
60

1  
2  
3  
4  
5 show clear evidence that combined exercise intervention has positive effects on improving  
6  
7  
8 glycemic and weight control, thus enhancing insulin sensitivity among overweight or obese  
9  
10 T2D patients. We recommend an exercise duration of >150 min/week to magnify the effect.  
11  
12  
13 More RCTs with robust methodological design, large sample size, and more comprehensive  
14  
15 body composition measurements are needed to elaborate the mechanisms and strengthen this  
16  
17  
18 conclusion. This review also highlights the need for further RCTs to investigate the ideal  
19  
20  
21 exercise duration, exercise intensity, and exercise time for overweight/obese T2D patients.  
22  
23  
24

25 **Contributors** XZ, QH, YZ, LC conceived the research; XZ, QH, YZ, LC established  
26  
27 eligibility criteria and Search strategy; XZ, QH worked on literature selection, data extraction  
28  
29 and quality assessment; XZ, QH, LC performed statistical analysis; XZ wrote paper; XZ, LC  
30  
31 had primary responsibility for final content; All authors read the manuscript and approved the  
32  
33 final draft.  
34

35 **Funding** This work was supported by National Natural Science Foundation of China (grant  
36  
37 number: 71904214) and Medical Science and Technology Research Foundation of  
38  
39 Guangdong Province (grant number: A2019003).  
40

41 **Competing interests** None declared.  
42  
43  
44

## 45 **References**

- 46  
47 1 International Diabetes Federation. IDF Diabetes Atlas. Ninth edition. 2019.
- 48  
49 2 World Health Organization. Overweight and Obesity. Available:  
50  
51 [52 https://www.who.int/gho/ncd/risk\\_factors/overweight\\_text/en/](https://www.who.int/gho/ncd/risk_factors/overweight_text/en/).
- 53  
54 3 Colosia AD, Palencia R, Khan S. Prevalence of hypertension and obesity in patients with  
55  
56 type 2 diabetes mellitus in observational studies: a systematic literature review. *Diabetes*,  
57  
58  
59  
60

1  
2  
3  
4  
5  
6  
7  
8  
9  
10  
11  
12  
13  
14  
15  
16  
17  
18  
19  
20  
21  
22  
23  
24  
25  
26  
27  
28  
29  
30  
31  
32  
33  
34  
35  
36  
37  
38  
39  
40  
41  
42  
43  
44  
45  
46  
47  
48  
49  
50  
51  
52  
53  
54  
55  
56  
57  
58  
59  
60

*metabolic syndrome and obesity: targets and therapy* 2013;6, 327-338.

4 Caspersen CJ, Powell KE, Christenson GM. Physical activity, exercise, and physical fitness: definitions and distinctions for health-related research. *Public health reports* (Washington, D.C.: 1974). 1985; 100(2), 126-131.

5 American Diabetes Association. 3. Prevention or delay of type 2 diabetes: Standards of Medical Care in Diabetes-2020. *Diabetes Care*, 43(Suppl. 1). 2020; S32–S36.

6 American Diabetes Association. 5. Lifestyle Management: Standards of Medical Care in Diabetes-2019. *Diabetes Care*, 42(Suppl 1). 2019; S46-S60.

7 World Health Organization. Obesity and overweight. 2020. Available:

<https://www.who.int/news-room/fact-sheets/detail/obesity-and-overweight>.

8 Oliveira C, Simoes M, Carvalho J, *et al*. Combined exercise for people with type 2 diabetes mellitus: A systematic review. *Diabetes Research and Clinical Practice*. 2012; 98(2), 187-198.

9 Cochrane Handbook for Systematic Reviews of Interventions Version 5.1.0. In Higgins JPT, Green LA, (Eds), *The Cochrane Collaboration* (p.174-219). 2011.

10 AminiLari Z, Fararouei M, Amanat S, *et al*. The Effect of 12 Weeks Aerobic, Resistance, and Combined Exercises on Omentin-1 Levels and Insulin Resistance among Type 2 Diabetic Middle-Aged Women. *Diabetes Metab J*. 2017; 41(3), 205-212.

11 Balducci S, Zanuso S, Nicolucci A, *et al*. Effect of an intensive exercise intervention strategy on modifiable cardiovascular risk factors in subjects with type 2 diabetes mellitus: a randomized controlled trial: the Italian Diabetes and Exercise Study (IDES). *Arch Intern*



- 1  
2  
3  
4  
5 *Med.* 2010; 170(20), 1794-1803.  
6  
7
- 8 12 Balducci S, Zanuso S, Nicolucci A, *et al.* Anti-inflammatory effect of exercise training in  
9  
10 subjects with type 2 diabetes and the metabolic syndrome is dependent on exercise  
11  
12 modalities and independent of weight loss. *Nutrition Metabolism and Cardiovascular*  
13  
14 *Diseases.* 2010; 20(8), 608-617.  
15  
16
- 17 13 Banitalebi E, Kazemi A, Faramarzi M, *et al.* Effects of sprint interval or combined aerobic  
18  
19 and resistance training on myokines in overweight women with type 2 diabetes: A  
20  
21 randomized controlled trial. *Life Sciences.* 2019; 217, 101-109.  
22  
23  
24
- 25 14 Bjorgaas M, Vik JT, Saeterhaug A, *et al.* Relationship between pedometer-registered  
26  
27 activity, aerobic capacity and self-reported activity and fitness in patients with type 2  
28  
29 diabetes. *Diabetes Obes Metab.* 2005; 7(6), 737-744.  
30  
31  
32
- 33 15 Johansen MY, MacDonald CS, Hansen KB, *et al.* Effect of an Intensive Lifestyle  
34  
35 Intervention on Glycemic Control in Patients with Type 2 Diabetes A Randomized Clinical  
36  
37 Trial. *Jama-Journal of the American Medical Association.* 2017; 318(7), 637-646.  
38  
39  
40
- 41 16 Leehey DJ, Collins E, Kramer HJ, *et al.* Structured Exercise in Obese Diabetic Patients  
42  
43 with Chronic Kidney Disease: A Randomized Controlled Trial. *American Journal of*  
44  
45 *Nephrology.* 2016; 44(1), 54-62.  
46  
47  
48
- 49 17 Lucotti P, Monti LD, Setola E, *et al.* Aerobic and resistance training effects compared to  
50  
51 aerobic training alone in obese type 2 diabetic patients on diet treatment. *Diabetes*  
52  
53 *Research and Clinical Practice.* 2011; 94(3), 395-403.  
54  
55  
56
- 57 18 Otten J, Stomby A, Waling M, *et al.* Benefits of a Paleolithic diet with and without  
58  
59  
60

- 1  
2  
3  
4  
5 supervised exercise on fat mass, insulin sensitivity, and glycemic control: a randomized  
6  
7  
8 controlled trial in individuals with type 2 diabetes. *Diabetes-Metabolism Research and*  
9  
10 *Reviews*. 2017; 33(1).
- 11  
12  
13 19 Vinetti G, Mozzini C, Desenzani P, *et al*. Supervised exercise training reduces oxidative  
14  
15 stress and cardiometabolic risk in adults with type 2 diabetes: a randomized controlled  
16  
17 trial. *Sci Rep*. 2015; 5, 9238.
- 18  
19  
20 20 Hou Y, Lin L, Li W, *et al*. Effect of combined training versus aerobic training alone on  
21  
22 glucose control and risk factors for complications in type 2 diabetic patients: a meta-  
23  
24 analysis. *International Journal of Diabetes in Developing Countries*. 2015; 35(4), 524-532.
- 25  
26  
27 21 Zou Z, Cai W, Cai M, *et a*. Influence of the intervention of exercise on obese type II  
28  
29 diabetes mellitus: A meta-analysis. *Prim Care Diabetes*. 2016; 10(3), 186-201.
- 30  
31  
32 22 Thaane T, Motala AA, McKune AJ. Effects of Short-Term Exercise in Overweight/Obese  
33  
34 Adults with Insulin Resistance or Type 2 Diabetes: A Systematic Review of Randomized  
35  
36 Controlled Trials. *Journal of Diabetes & Metabolism*. 2018; 9(12).
- 37  
38  
39 23 Way KL, Hackett DA, Baker MK, *et al*. The Effect of Regular Exercise on Insulin  
40  
41 Sensitivity in Type 2 Diabetes Mellitus: A Systematic Review and Meta-Analysis.  
42  
43 *Diabetes Metab J*. 2016; 40(4), 253-271.
- 44  
45  
46 24 Pan B, Ge L, Xun Y, *et al*. Exercise training modalities in patients with type 2 diabetes  
47  
48 mellitus: a systematic review and network meta-analysis. *International Journal of*  
49  
50 *Behavioral Nutrition and Physical Activity*. 2018; 15.
- 51  
52  
53 25 Costanzo P, Cleland JGF, Pellicori P, *et al*. The Obesity Paradox in Type 2 Diabetes  
54  
55  
56  
57  
58  
59  
60

- 1  
2  
3  
4  
5 Mellitus: Relationship of Body Mass Index to Prognosis A Cohort Study. *Annals of*  
6  
7  
8 *Internal Medicine*. 2015; 162(9), 610-U208.  
9
- 10 26 American Diabetes Association. Cardiovascular Disease and Risk Management: Standards  
11  
12 of Medical Care in Diabetes-2020. *Diabetes Care*. 2020; 43, S111-S134.  
13  
14
- 15 27 Albalawi H, Coulter E, Ghouri N, *et al*. The effectiveness of structured exercise in the  
16  
17 south Asian population with type 2 diabetes: a systematic review. *Physician and*  
18  
19 *Sportsmedicine*. 2017; 45(4), 408-417.  
20  
21  
22
- 23 28 Bersaoui M, Baldew SSM, Cornelis N, *et al*. The effect of exercise training on blood  
24  
25 pressure in African and Asian populations: A systematic review and meta-analysis of  
26  
27 randomized controlled trials. *European Journal of Preventive Cardiology*. 2020; 27(5),  
28  
29 457-472.  
30  
31  
32
- 33 29 Cai X, Hu D, Pan C, *et al*. The risk factors of glycemic control, blood pressure control,  
34  
35 lipid control in Chinese patients with newly diagnosed type 2 diabetes\_A nationwide  
36  
37 prospective cohort study. *Sci Rep*. 2019;9.  
38  
39  
40
- 41 30 Wen CP, Wai JPM, Tsai MK, *et al*. Minimum amount of physical activity for reduced  
42  
43 mortality and extended life expectancy: a prospective cohort study. *Lancet*. 2011;  
44  
45 378(9798), 1244-1253.  
46  
47  
48
- 49 31 Umpierre D, Ribeiro PAB, Kramer CK, *et al*. Physical Activity Advice Only or Structured  
50  
51 Exercise Training and Association With HbA(1c) Levels in Type 2 Diabetes A Systematic  
52  
53 Review and Meta-analysis. *Jama-Journal of the American Medical Association*. 2011;  
54  
55 305(17), 1790-1799.  
56  
57  
58  
59  
60

- 1  
2  
3  
4  
5 32 Figueira FR, Umpierre D, Cureau FV, *et al.* Association between Physical Activity  
6  
7  
8 Advice Only or Structured Exercise Training with Blood Pressure Levels in Patients with  
9  
10 Type 2 Diabetes: A Systematic Review and Meta-Analysis. *Sports Medicine*. 2014; 44(11),  
11  
12 1557-1572.  
13  
14  
15 33 Umpierre D, Ribeiro PAB, Schaan BD, *et al.* Volume of supervised exercise training  
16  
17 impacts glycaemic control in patients with type 2 diabetes: a systematic review with meta-  
18  
19 regression analysis. *Diabetologia*. 2013; 56(2), 242-251.  
20  
21  
22 34 Cradock KA, O'Leary G, Finucane FM, *et al.* Behaviour change techniques targeting both  
23  
24 diet and physical activity in type 2 diabetes: A systematic review and meta-analysis.  
25  
26  
27 *International Journal of Behavioral Nutrition and Physical Activity*. 2017; 14.  
28  
29  
30 35 Franz MJ, Boucher JL, Rutten-Ramos S, *et al.* Lifestyle Weight-Loss Intervention  
31  
32 Outcomes in Overweight and Obese Adults with Type 2 Diabetes: A Systematic Review  
33  
34 and Meta-Analysis of Randomized Clinical Trials. *J Acad Nutr Diet*. 2015; 115(9), 1447-  
35  
36 1463.  
37  
38  
39 36 Fletcher GF, Landolfo C, Niebauer J, *et al.* Promoting Physical Activity and Exercise  
40  
41  
42 JACC Health Promotion Series. *Journal of the American College of Cardiology*. 2018;  
43  
44 72(14), 1622-1639.  
45  
46  
47  
48  
49  
50  
51

## 52 **Figure Captions**

53  
54 **Figure 1** Flow chart for study selection according to PRISMA Declaration 2009

55  
56  
57 **Figure 2** Quality assessment of the included studies. (A) as percentages across all included  
58  
59  
60

1  
2  
3  
4  
5 studies in risk of bias graph; (B) Bias risk of the included studies. “+” indicates Low risk of  
6 bias; “?” represents unclear risk of bias; “-” indicates high risk of bias.  
7  
8  
9

10 **Figure 3** Comparison of HbA1c and body mass index (BMI) between intervention group and  
11 control group in overweight or obese T2D patients. (A) Forest plot of HbA1c; (B) Forest plot  
12 of BMI; Unit of HbA1c is “%”. Unit of BMI is “kg/m<sup>2</sup>”.  
13  
14  
15  
16  
17

18 **Figure 4** Comparison of homeostasis model assessment of insulin resistance (HOMA-IR) and  
19 serum insulin between intervention group and control group in overweight or obese T2D  
20 patients. (A) Forest plot of HOMA-IR; (B) Forest plot of serum insulin. HOMA-IR has no units.  
21 Unit of serum insulin is “μIU/mL”.  
22  
23  
24  
25  
26  
27  
28

29 **Figure 5** Comparison of systolic blood pressure (SBP) and diastolic blood pressure (DBP)  
30 between intervention group and control group in overweight or obese T2D patients. (A) Forest  
31 plot of SBP; (B) Forest plot of DBP. Units of SBP and DBP are both “mmHg”.  
32  
33  
34  
35  
36

37 **Figure 6** Comparison of triglycerides (TG), total cholesterol (TC), high-density lipoprotein  
38 cholesterol (HDL-C) and low-density lipoprotein cholesterol (LDL-C) between intervention  
39 group and control group in overweight or obese T2D patients. (A) Forest plot of TG; (B) Forest  
40 plot of TC; (C) Forest plot of HDL-C; (D) Forest plot of LDL-C. Units of TG, TC, HDL-C and  
41 LDL-C are “mg/dL”.  
42  
43  
44  
45  
46  
47  
48  
49  
50  
51  
52  
53  
54  
55  
56  
57  
58  
59  
60

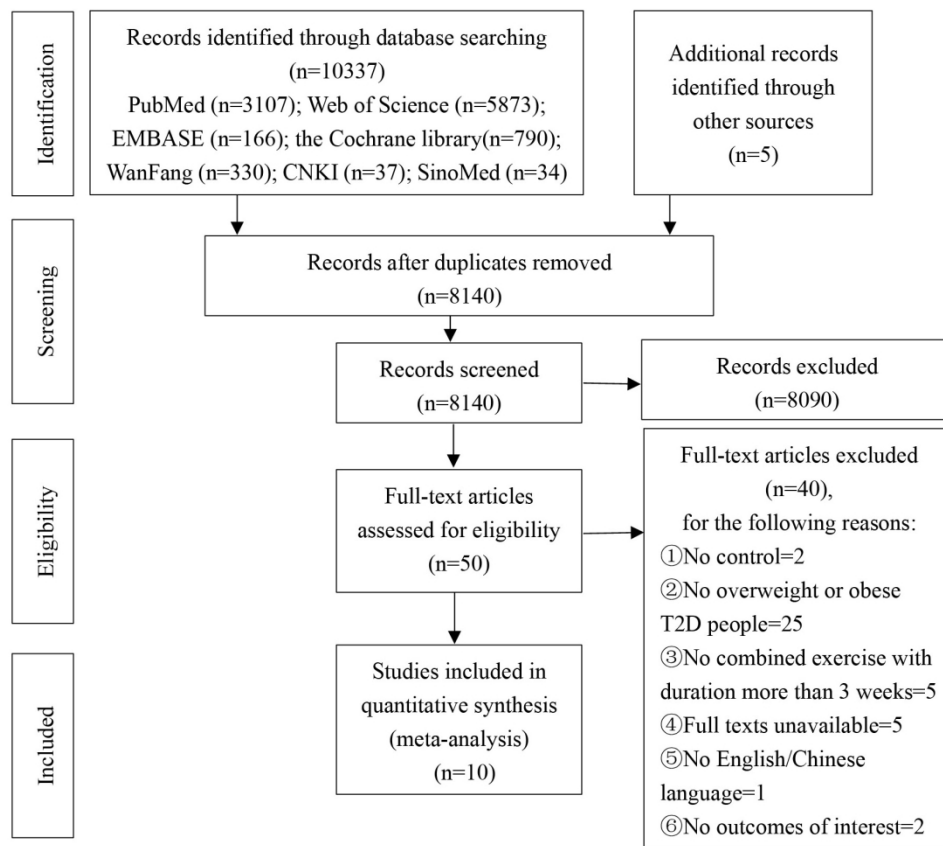

Figure 1 Flow chart for study selection according to PRISMA Declaration 2009

509x453mm (96 x 96 DPI)

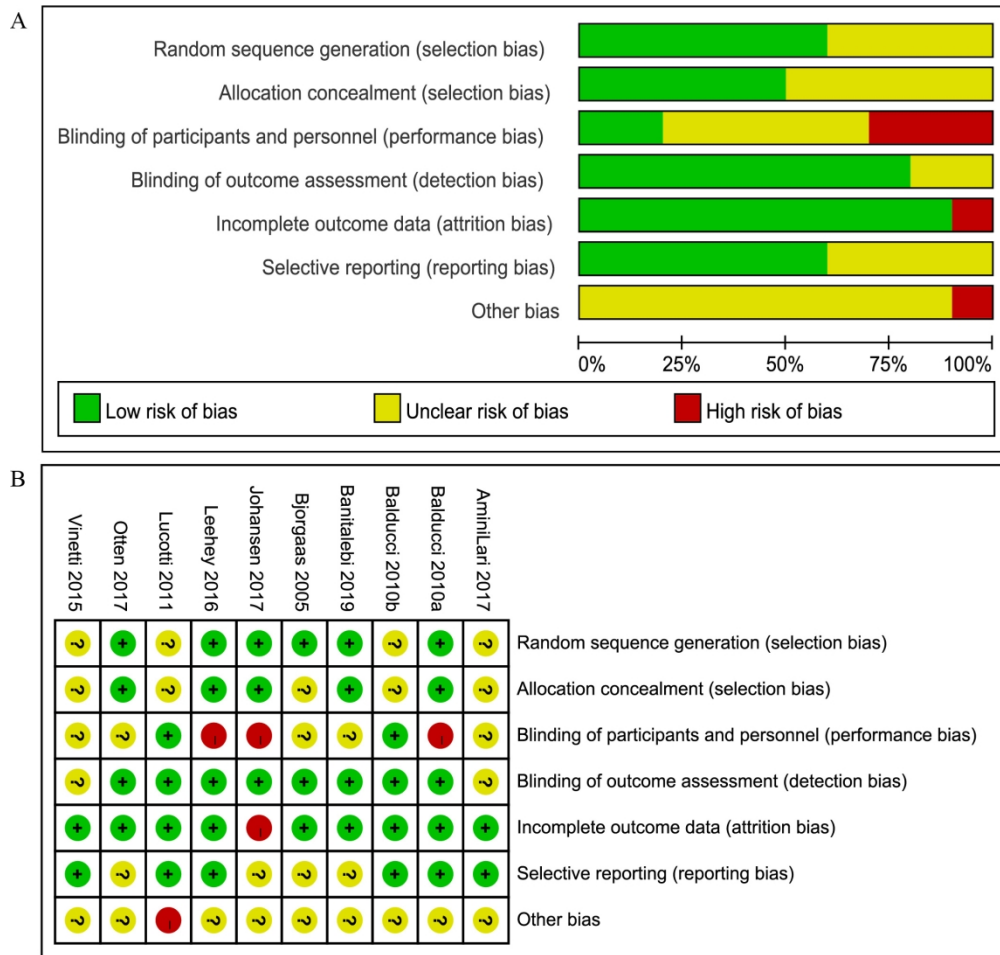

Figure 2 Quality assessment of the included studies. (A) as percentages across all included studies in risk of bias graph ;(B) Bias risk of the included studies. "+" indicates Low risk of bias; "?"represents unclear risk of bias; "-" indicates high risk of bias.

177x169mm (300 x 300 DPI)

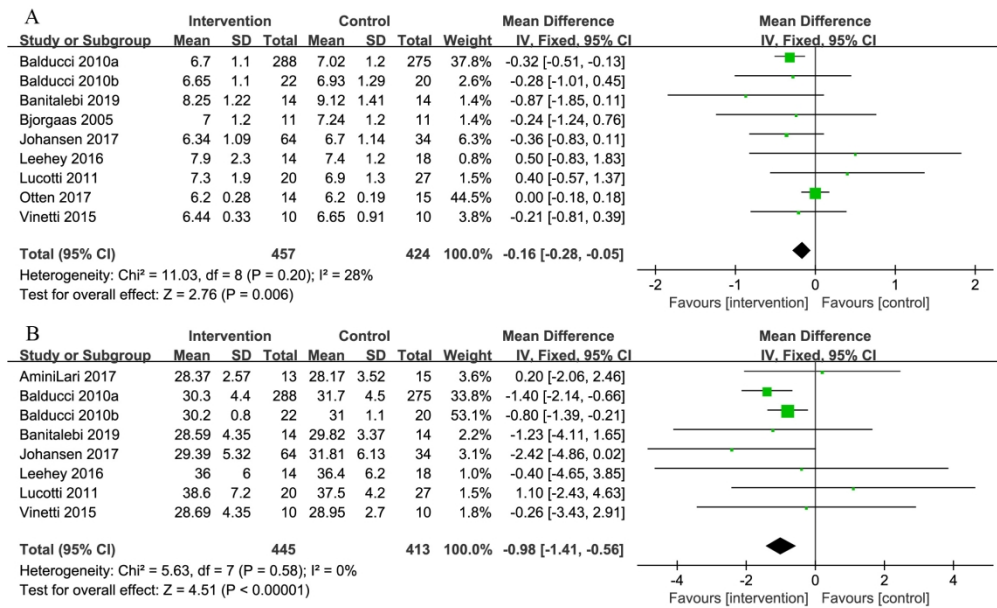

Figure 3 Comparison of HbA1c and body mass index (BMI) between intervention group and control group in overweight or obese T2DM patients. (A) Forest plot of HbA1c; (B) Forest plot of BMI; Unit of HbA1c is "%". Unit of BMI is "kg/m<sup>2</sup>".

195x119mm (300 x 300 DPI)



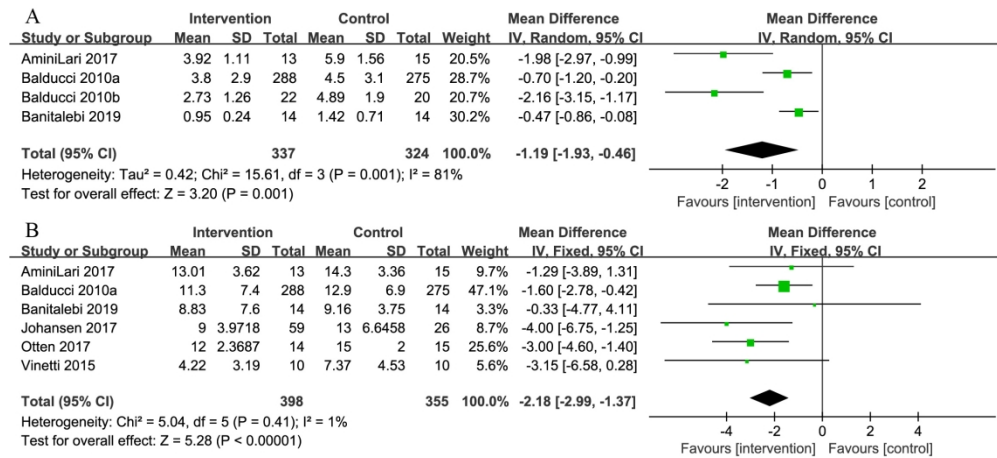

Figure 4 Comparison of homeostasis model assessment of insulin resistance (HOMA-IR) and serum insulin between intervention group and control group in overweight or obese T2DM patients. (A) Forest plot of HOMA-IR; (B) Forest plot of serum insulin. HOMA-IR has no units. Unit of serum insulin is "µIU/mL".

195x89mm (300 x 300 DPI)

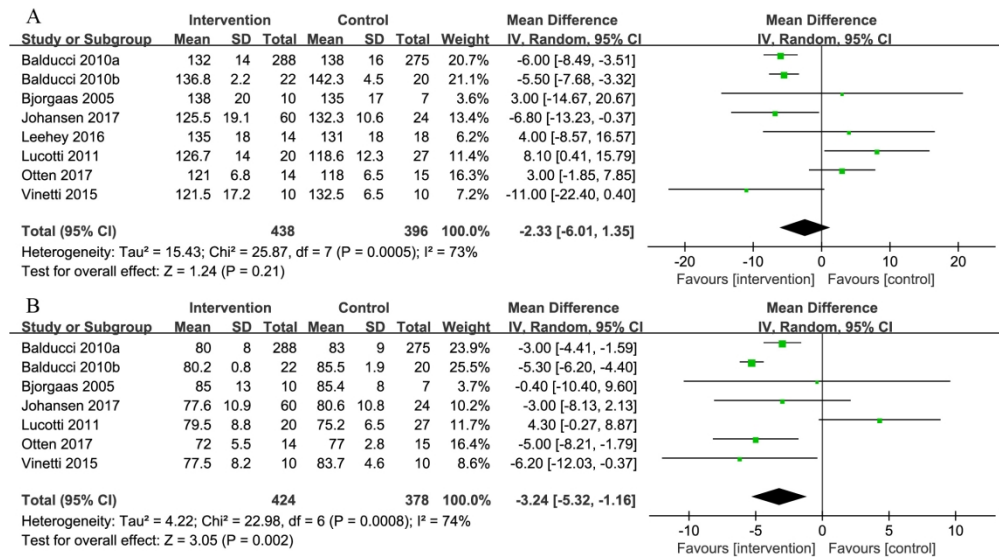

Figure 5 Comparison of systolic blood pressure (SBP) and diastolic blood pressure (DBP) between intervention group and control group in overweight or obese T2DM patients. (A) Forest plot of SBP; (B) Forest plot of DBP. Units of SBP and DBP are both "mmHg".

195x109mm (300 x 300 DPI)

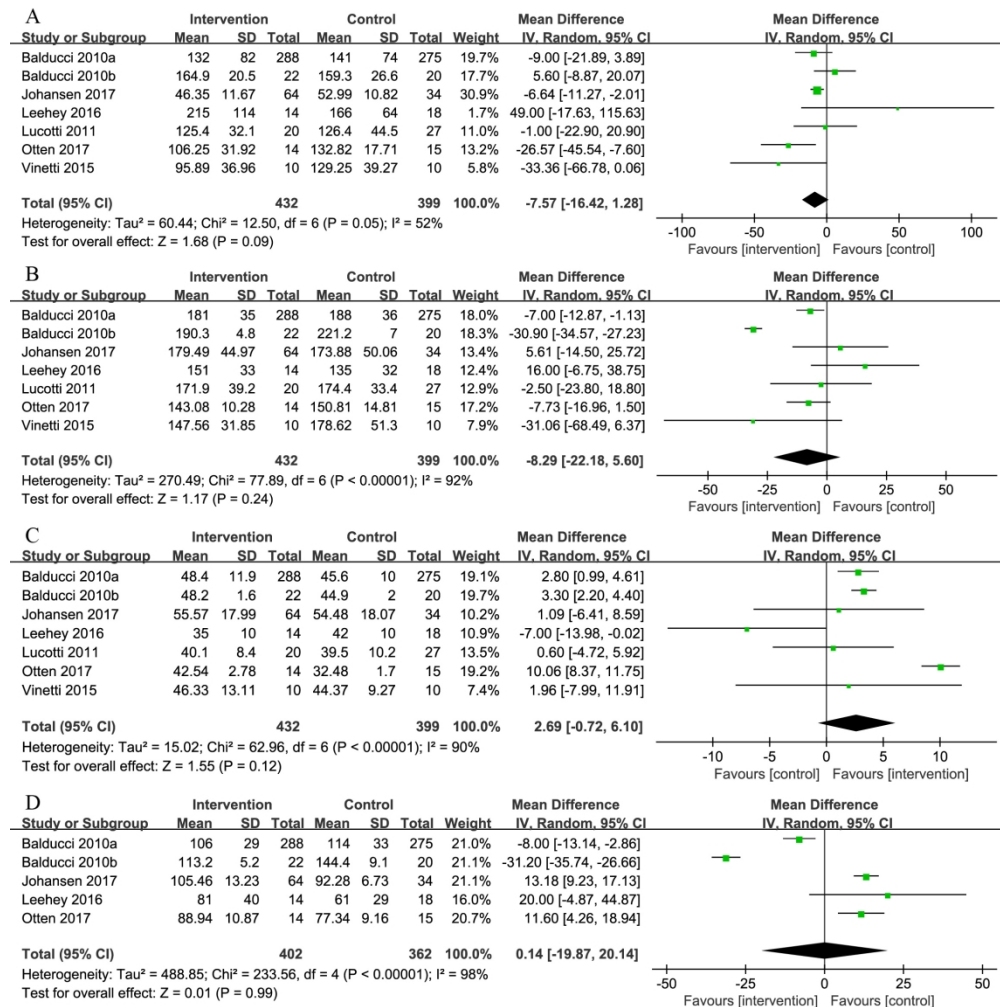

Figure 6 Comparison of triglycerides (TG), total cholesterol (TC), high-density lipoprotein cholesterol (HDL-C) and low-density lipoprotein cholesterol (LDL-C) between intervention group and control group in overweight or obese T2DM patients. (A) Forest plot of TG; (B) Forest plot of TC; (C) Forest plot of HDL-C; (D) Forest plot of LDL-C. Units of TG, TC, HDL-C and LDL-C are "mg/dL".

195x197mm (300 x 300 DPI)

PRISMA-P (preferred reporting items for systematic review and meta-analysis protocols) 2015 checklist: recommended items to address in a systematic review protocol

| Section and topic                 | Item No | Checklist item                                                                                                                                                                                  | Reported on page # |
|-----------------------------------|---------|-------------------------------------------------------------------------------------------------------------------------------------------------------------------------------------------------|--------------------|
| <b>Administrative information</b> |         |                                                                                                                                                                                                 |                    |
| Title:                            |         |                                                                                                                                                                                                 |                    |
| Identification                    | 1a      | Identify the report as a protocol of a systematic review                                                                                                                                        | Page 2             |
| Update                            | 1b      | If the protocol is for an update of a previous systematic review, identify as such                                                                                                              | Not applicable     |
| Registration                      | 2       | If registered, provide the name of the registry (such as PROSPERO) and registration number                                                                                                      | Not applicable*    |
| Authors:                          |         |                                                                                                                                                                                                 |                    |
| Contact                           | 3a      | Provide name, institutional affiliation, e-mail address of all protocol authors; provide physical mailing address of corresponding author                                                       | Page 2             |
| Contributions                     | 3b      | Describe contributions of protocol authors and identify the guarantor of the review                                                                                                             | Page 21            |
| Amendments                        | 4       | If the protocol represents an amendment of a previously completed or published protocol, identify as such and list changes; otherwise, state plan for documenting important protocol amendments | Not applicable     |
| Support:                          |         |                                                                                                                                                                                                 |                    |
| Sources                           | 5a      | Indicate sources of financial or other support for the review                                                                                                                                   | Page 21            |
| Sponsor                           | 5b      | Provide name for the review funder and/or sponsor                                                                                                                                               | Page 21            |

| Section and topic         | Item No | Checklist item                                                                                                                                                                                                                | Reported on page # |
|---------------------------|---------|-------------------------------------------------------------------------------------------------------------------------------------------------------------------------------------------------------------------------------|--------------------|
| Role of sponsor or funder | 5c      | Describe roles of funder(s), sponsor(s), and/or institution(s), if any, in developing the protocol                                                                                                                            | Not applicable     |
| <b>Introduction</b>       |         |                                                                                                                                                                                                                               |                    |
| Rationale                 | 6       | Describe the rationale for the review in the context of what is already known                                                                                                                                                 | Page 4-5           |
| Objectives                | 7       | Provide an explicit statement of the question(s) the review will address with reference to participants, interventions, comparators, and outcomes (PICO)                                                                      | Page 5             |
| <b>Methods</b>            |         |                                                                                                                                                                                                                               |                    |
| Eligibility criteria      | 8       | Specify the study characteristics (such as PICO, study design, setting, time frame) and report characteristics (such as years considered, language, publication status) to be used as criteria for eligibility for the review | Page 6-7           |
| Information sources       | 9       | Describe all intended information sources (such as electronic databases, contact with study authors, trial registers or other grey literature sources) with planned dates of coverage                                         | Page 7-8           |
| Search strategy           | 10      | Present draft of search strategy to be used for at least one electronic database, including planned limits, such that it could be repeated                                                                                    | Page 7             |
| Study records:            |         |                                                                                                                                                                                                                               |                    |
| Data management           | 11a     | Describe the mechanism(s) that will be used to manage records and data throughout the review                                                                                                                                  | Page 8             |
| Selection process         | 11b     | State the process that will be used for selecting studies (such as two independent reviewers) through each phase of the review (that is, screening, eligibility and inclusion in meta-analysis)                               | Page 8             |

| Section and topic                  | Item No | Checklist item                                                                                                                                                                                                                                   | Reported on page # |
|------------------------------------|---------|--------------------------------------------------------------------------------------------------------------------------------------------------------------------------------------------------------------------------------------------------|--------------------|
| Data collection process            | 11c     | Describe planned method of extracting data from reports (such as piloting forms, done independently, in duplicate), any processes for obtaining and confirming data from investigators                                                           | Page 8             |
| Data items                         | 12      | List and define all variables for which data will be sought (such as PICO items, funding sources), any pre-planned data assumptions and simplifications                                                                                          | Page 8             |
| Outcomes and prioritization        | 13      | List and define all outcomes for which data will be sought, including prioritization of main and additional outcomes, with rationale                                                                                                             | Page 6-7           |
| Risk of bias in individual studies | 14      | Describe anticipated methods for assessing risk of bias of individual studies, including whether this will be done at the outcome or study level, or both; state how this information will be used in data synthesis                             | Page 8             |
| Data synthesis                     | 15a     | Describe criteria under which study data will be quantitatively synthesised                                                                                                                                                                      | Page 6-7           |
|                                    | 15b     | If data are appropriate for quantitative synthesis, describe planned summary measures, methods of handling data and methods of combining data from studies, including any planned exploration of consistency (such as $I^2$ , Kendall's $\tau$ ) | Page 8-9           |
|                                    | 15c     | Describe any proposed additional analyses (such as sensitivity or subgroup analyses, meta-regression)                                                                                                                                            | Page 9             |
|                                    | 15d     | If quantitative synthesis is not appropriate, describe the type of summary planned                                                                                                                                                               | Not applicable     |
| Meta-bias(es)                      | 16      | Specify any planned assessment of meta-bias(es) (such as publication bias across studies, selective reporting within studies)                                                                                                                    | Page 9             |

1  
2  
3  
4  
5  
6  
7  
8  
9  
10  
11  
12  
13  
14  
15  
16  
17  
18  
19  
20  
21  
22  
23  
24  
25  
26  
27  
28  
29  
30  
31  
32  
33  
34  
35  
36  
37  
38  
39  
40  
41  
42  
43  
44  
45  
46

| Section and topic                 | Item No | Checklist item                                                                     | Reported on page # |
|-----------------------------------|---------|------------------------------------------------------------------------------------|--------------------|
| Confidence in cumulative evidence | 17      | Describe how the strength of the body of evidence will be assessed (such as GRADE) | Page 8             |

\*The protocol is described in the Methods. Registration does not apply.

For peer review only

# BMJ Open

## Effectiveness of combined exercise in people with type 2 diabetes and concurrent overweight/ obesity: a systematic review and meta-analysis

|                                 |                                                                                                                                                                                                                        |
|---------------------------------|------------------------------------------------------------------------------------------------------------------------------------------------------------------------------------------------------------------------|
| Journal:                        | <i>BMJ Open</i>                                                                                                                                                                                                        |
| Manuscript ID                   | bmjopen-2020-046252.R1                                                                                                                                                                                                 |
| Article Type:                   | Original research                                                                                                                                                                                                      |
| Date Submitted by the Author:   | 26-May-2021                                                                                                                                                                                                            |
| Complete List of Authors:       | Zhao, Xiaoyan; The Eighth Affiliated Hospital of Sun Yat-Sen University, He, Qianyu; Sun Yat-Sen University<br>Zeng, Yongmei; Third Affiliated Hospital of Sun Yat-Sen University<br>Cheng, Li; Sun Yat-Sen University |
| <b>Primary Subject Heading</b>: | Diabetes and endocrinology                                                                                                                                                                                             |
| Secondary Subject Heading:      | Sports and exercise medicine                                                                                                                                                                                           |
| Keywords:                       | General diabetes < DIABETES & ENDOCRINOLOGY, MEDICAL EDUCATION & TRAINING, PUBLIC HEALTH                                                                                                                               |
|                                 |                                                                                                                                                                                                                        |

SCHOLARONE™  
Manuscripts





I, the Submitting Author has the right to grant and does grant on behalf of all authors of the Work (as defined in the below author licence), an exclusive licence and/or a non-exclusive licence for contributions from authors who are: i) UK Crown employees; ii) where BMJ has agreed a CC-BY licence shall apply, and/or iii) in accordance with the terms applicable for US Federal Government officers or employees acting as part of their official duties; on a worldwide, perpetual, irrevocable, royalty-free basis to BMJ Publishing Group Ltd ("BMJ") its licensees and where the relevant Journal is co-owned by BMJ to the co-owners of the Journal, to publish the Work in this journal and any other BMJ products and to exploit all rights, as set out in our [licence](#).

The Submitting Author accepts and understands that any supply made under these terms is made by BMJ to the Submitting Author unless you are acting as an employee on behalf of your employer or a postgraduate student of an affiliated institution which is paying any applicable article publishing charge ("APC") for Open Access articles. Where the Submitting Author wishes to make the Work available on an Open Access basis (and intends to pay the relevant APC), the terms of reuse of such Open Access shall be governed by a Creative Commons licence – details of these licences and which [Creative Commons](#) licence will apply to this Work are set out in our licence referred to above.

Other than as permitted in any relevant BMJ Author's Self Archiving Policies, I confirm this Work has not been accepted for publication elsewhere, is not being considered for publication elsewhere and does not duplicate material already published. I confirm all authors consent to publication of this Work and authorise the granting of this licence.

1  
2  
3  
4 **Title page**  
5  
6  
7  
8

9 **Title.** Effectiveness of combined exercise in people with type 2 diabetes and concurrent  
10 overweight/ obesity: a systematic review and meta-analysis  
11  
12

13  
14 **Authors.** Xiaoyan Zhao<sup>a</sup>, Qianyu He<sup>b</sup>, Yongmei Zeng<sup>c</sup>, Li Cheng<sup>b\*</sup>  
15  
16

17 <sup>a</sup> The Eighth Affiliated Hospital, Sun Yat-sen University, Shenzhen, China.  
18

19 <sup>b</sup> School of Nursing, Sun Yat-sen University, Guangzhou, China.  
20  
21

22 <sup>c</sup> The Third Affiliated Hospital, Sun Yat-sen University, Guangzhou, China.  
23

24 \*Corresponding author, No. 74, 2nd Yat-sen Road, Yuexiu District, Guangzhou, Guangdong,  
25 China. Tel: +86-020-87335693; Fax: +86-020-87333043; Email: [chengli5@mail.sysu.edu.cn](mailto:chengli5@mail.sysu.edu.cn)  
26  
27  
28  
29  
30  
31

32 **Keywords.** Diabetes, Type 2; Combined exercise; Obesity; Overweight.  
33  
34

35 **Word count.** 3,049  
36  
37  
38  
39  
40  
41  
42  
43  
44  
45  
46  
47  
48  
49  
50  
51  
52  
53  
54  
55  
56  
57  
58  
59  
60

## Abstract

**Objective.** To synthesize the available scientific evidence on the effects of combined exercise on glycemic control, weight loss, insulin sensitivity, blood pressure, and serum lipids among patients with type 2 diabetes (T2D) and concurrent overweight/obesity. **Design and Sample.** PubMed, EMBASE, Web of Science, the Cochrane library, WANFANG, CNKI, SinoMed, OpenGrey, and ClinicalTrials.gov were searched from inception through April 2020 to identify randomized controlled trials (RCTs) that reported the effects of combined exercise in individuals with T2D and concurrent overweight/obesity. **Methods.** Quality assessment was performed using the Cochrane Collaboration's risk of bias tool. The mean difference (MD) with its corresponding 95% confidence interval (CI) was used to estimate the effect size. Meta-analysis was performed using Review Manager 5.3. **Results.** A total of 10 RCTs with 978 participants were included in the meta-analysis. Pooled results demonstrated that combined exercise significantly reduced hemoglobin A1c (MD=-0.16%, 95%CI: -0.28 to -0.05, P=0.006); body mass index (MD=-0.98 kg/m<sup>2</sup>, 95%CI: -1.41 to -0.56, P<0.001); homeostasis model assessment of insulin resistance (MD=-1.19, 95%CI: -1.93 to -0.46, P=0.001); serum insulin (MD=-2.18 µIU/mL, 95%CI: -2.99 to -1.37, P<0.001); and diastolic blood pressure (MD=-3.24 mmHg, 95%CI: -5.32 to -1.16, P=0.002). **Conclusions.** Combined exercise exerted significant effects in improving glycemic control, influencing weight loss, and enhancing insulin sensitivity among patients with T2D and concurrent overweight/obesity.

## Strengths and limitations of this study

- ▶ This study provided a comprehensive assessment of the effect of combined exercise in patients with T2D and concurrent overweight/obesity.
- ▶ Nine electronic databases were searched to provide a comprehensive range of studies.
- ▶ Because of strict inclusion and exclusion criteria, potential selection bias was minimized.
- ▶ A limitation is the substantial heterogeneity among the included studies.
- ▶ There were insufficient data to undertake subgroup analyses for some types of tests.

## Introduction

The number of patients with diabetes is increasing globally, with an estimated 463 million adults diagnosed with diabetes. This number is predicted to exceed 700 million by 2045.<sup>1</sup> Type 2 diabetes (T2D), characterized by hyperglycemia resulting from hyposecretion of insulin and/or insulin resistance, accounts for nearly 90% of all types of diabetes.<sup>1</sup> Propelling the surge of diabetes is the increasing prevalence of overweight and obesity. Data from the World Health Organization<sup>2</sup> show that nearly 2 billion adults are overweight and more than half a billion worldwide are obese. Furthermore, obesity accounts for 50.9–98.6% of adults with T2D in Europe and 56.1% in Asia.<sup>3</sup> Overweight and obesity contribute to the development of cardiovascular disease, cancer, T2D, hypertension, dyslipidemia, and mental health disorders. The coexistence of excess body weight and diabetes further aggravates the quality of life of individuals and imposes a tremendous burden on the healthcare system. Although various exercise options are available for individuals with either T2D or excess weight, individuals with

1  
2  
3  
4 T2D and concurrent overweight/obesity receive little attention. Measures to support individuals  
5  
6 to optimize glycemic control and weight management remain elusive.  
7

8  
9 Physical activity (defined as all body movement that increases energy use) and exercise  
10  
11 (defined as a structured form of physical activity)<sup>4</sup> have been recommended as the key  
12  
13 components of lifestyle management for patients with T2D and concurrent overweight/obesity.  
14  
15 Combined exercise involves aerobic exercise (repeated and continuous movement of large  
16  
17 muscle groups when oxygen supply is sufficient) and resistance exercise (a strength-training  
18  
19 workout that uses some form of resistance or tension) performed within the same or separate  
20  
21 exercise sessions of a training program.<sup>5 6</sup> Compelling evidence shows that aerobic exercise has  
22  
23 an active effect on receptor affinity (adipose tissue, skeletal muscle, and insulin receptors),  
24  
25 thereby inducing insulin sensitivity and glucose homeostasis.<sup>1 7 8</sup> Resistance exercise can  
26  
27 enhance muscle strength, insulin sensitivity and muscle rehabilitation.<sup>7 8</sup> Current national and  
28  
29 international guidelines recommend that people with diabetes should perform combined exercise,  
30  
31 integrating both aerobic (at least 150 min per week of moderate-vigorous aerobic activities) and  
32  
33 resistance exercise (two sessions per week at least 60 min).<sup>8 9</sup> However, in reality, the adoption  
34  
35 rate of combined exercise is quite low, and the combined modes have the potential to become  
36  
37 excessively burdensome. Moreover, it remains unclear whether the combined exercise modes  
38  
39 can exert benefits on glycemic control and body weight among individuals with T2D and  
40  
41 concurrent overweight/obesity.  
42  
43  
44  
45  
46  
47  
48  
49  
50  
51

52  
53 Therefore, the aim of this systematic review and meta-analysis is to synthesize the best  
54  
55 available evidence and explore the effectiveness of combined exercise on glycemic control,  
56  
57  
58  
59

1  
2  
3  
4 weight loss, insulin sensitivity, blood pressure (BP), and serum lipids among patients with T2D  
5  
6 and concurrent overweight/obesity.  
7  
8  
9

## 10 11 **Materials and Methods**

12  
13  
14 This systematic review and meta-analysis was conducted according to the Preferred  
15 Reporting Items for Systematic Reviews and Meta-Analyses (PRISMA) statement.<sup>10</sup>  
16  
17

### 18 **Inclusion and exclusion criteria**

19  
20 *Eligibility was defined according to the PICO (Patient, Intervention, Comparison, Outcome)*

#### 21 *framework:*

##### 22 *Type of participants:*

23  
24  
25 (1) T2D patients aged  $\geq 18$  years; (2) overweight or obesity indicated by body mass index  
26  
27 (BMI) (BMI  $\geq 25$  kg/m<sup>2</sup> for Caucasians or BMI  $\geq 23$  kg/m<sup>2</sup> for Asian subjects).<sup>11</sup>  
28  
29

##### 30 *Type of intervention and comparison:*

31  
32 (1) Included an intervention group performing the combined form of exercise, which  
33  
34 included both aerobic (e.g., jogging, running, cycling, brisk walking) and resistance (e.g., push-  
35  
36 ups, abdominal crunch, chest press, leg press, squats, knee extensions) exercise with predefined  
37  
38 intensity, frequency, and duration; (2) exercise intervention time  $\geq 3$  weeks;<sup>12</sup> and (3) potential  
39  
40 comparison groups included any format of exercise intervention, general health counseling, or  
41  
42 usual care.  
43  
44  
45  
46  
47  
48  
49  
50  
51

##### 52 *Outcomes:*

53  
54  
55 Primary outcomes included hemoglobin A1c (HbA1c) and BMI at the data collection  
56  
57  
58  
59  
60

1  
2  
3  
4 timepoint. Secondary outcomes included serum insulin, homeostasis model assessment of insulin  
5  
6 resistance (HOMA-IR), systolic blood pressure (SBP), diastolic blood pressure (DBP),  
7  
8 triglycerides (TG), total cholesterol (TC), high-density lipoprotein cholesterol (HDL-C), low-  
9  
10 density lipoprotein cholesterol (LDL-C), or psycho-behavioral outcomes such as exercise  
11  
12 performance, muscle strength or performance, exercise adherence, exercise self-efficacy,  
13  
14 emotional well-being, anxiety, depression, and objective measures (e.g., pedometers or  
15  
16 accelerometers).

17  
18  
19  
20  
21  
22 *Type of studies:*

23  
24  
25 Randomized controlled trials (RCTs).

26  
27 *Exclusion criteria:*

28  
29  
30 Studies were excluded if (1) participants were diagnosed with type 1 diabetes or gestational  
31  
32 diabetes; (2) participants suffered from severe complications that impeded exercise engagement,  
33  
34 such as acute infection, diabetic foot, diabetes ketoacidosis, severe hepatorenal insufficiency,  
35  
36 diabetic retinopathy, or obstacles to limb movement; (3) vague description of exercise  
37  
38 intervention in terms of time and type; and (4) full texts were not available.  
39  
40  
41  
42

43 **Search strategy and literature selection**

44  
45 The literature retrieval was performed in PubMed, EMBASE, Web of Science, the  
46  
47 Cochrane library, WANFANG, CNKI, and SinoMed from inception through April 2020 for  
48  
49 published studies; OpenGrey and ClinicalTrials.gov were also searched for unpublished studies.  
50  
51  
52 The reference lists of eligible publications were also retrieved to identify additional eligible  
53  
54 studies. Keywords with the combination of medical subject heading (MeSH) terms were used in  
55  
56  
57  
58  
59  
60

1  
2  
3  
4 the search strategy: aerobic, exercise, training, isometric exercise, physical activity, physical  
5  
6 exercise, resistance, strength training, strength exercise, weight lifting, weight bearing, combined  
7  
8 exercise, diabetes, DM, T2D, NIDDM, overweight, obese, obesity, body mass index, BMI, body  
9  
10 weight, and adiposity (Supplementary file). After removing duplicate records, two reviewers  
11  
12 independently selected potential articles by assessing titles and abstracts. Then, full texts were  
13  
14 further screened to identify study eligibility; at this stage, the two reviewers checked whether the  
15  
16 participants were human subjects with T2D and concurrent overweight/obesity instead of animal  
17  
18 model studies or people without T2D and concurrent overweight/obesity, and they eliminated  
19  
20 articles that had no desired results shown in the inclusion criteria. Any disagreements or  
21  
22 discrepancies regarding the selection of potential studies were resolved through discussion, and a  
23  
24 third reviewer was consulted in case of any disagreement.  
25  
26  
27  
28  
29  
30  
31

### 32 **Data extraction**

33  
34  
35 Two reviewers independently extracted details of the included studies using a structured  
36  
37 data extraction form, including the study design, sample size, exercise intervention details, data  
38  
39 collection time points, participant characteristics, and outcomes (Table 1). Any disagreements or  
40  
41 discrepancies regarding data extraction were resolved through discussion, and a third reviewer  
42  
43 was consulted in case of any disagreement.  
44  
45  
46  
47

### 48 **Quality assessment**

49  
50  
51 The risk of bias of included studies was assessed using the Cochrane Collaboration's Risk  
52  
53 of Bias assessment tool.<sup>13</sup> The quality of studies was judged to have low, unclear, or high risk of  
54  
55 bias.  
56  
57  
58  
59  
60



## Data analysis

All analyses were performed using RevMan5.3 (Cochrane Collaboration, <http://ims.cochrane.org/revman>). Heterogeneity was assessed using Cochran's Q test and the I<sup>2</sup>-test. A random effects model was applied to calculate the pooled results if I<sup>2</sup>≥50%; otherwise, a fixed effects model was used. Subgroup analysis on primary outcomes stratified by exercise frequency was conducted. The mean difference (MD) with its corresponding 95% confidence interval (CI) was used to calculate the effect size. A two-sided p<0.05 was considered to indicate statistical significance.

## Patient and public involvement

No patient involved.

## Results

### Search outcome

A total of 10,580 records were identified. After duplicate deletion, 8,383 articles were screened for titles and abstracts, and 50 articles were further screened for full text. Finally, 10 studies were deemed eligible and included in this meta-analysis (Figure 1).

An overview of the characteristics of included studies is summarized in Table 1. Across the included studies, the sample size ranged from 20 to 606; the intervention duration ranged from 3 to 52 weeks; the mean (SD) age of participants was similar across the included studies (range: 53.6 [9.1]–66.6 [7.5]) years; the baseline mean (SD) HbA1c ranged from 6.44 (0.33) to 9.50 (0.90); and the baseline mean (SD) BMI ranged from 28.15 (3.72) to 39.9 (7.3) kg/m<sup>2</sup>.

**Table 1.** characteristics of the included studies.

| Author<br>Year     | Country | Sample size<br>(EX/CON) | Combined exercise intervention                                                                                                            |                             |                                                                                                                                                                                                                                    |                                                                |                          |                               |                                 |                                                                                                                                                                                                                                                                                                                                                                           | Control | Time<br>points of<br>data<br>collection<br>(week) | Participant characteristics       |                                   |                                                 | Dropout<br>rate<br>(%) | Outcomes                                                                                   | Adverse events                                                                                                         |
|--------------------|---------|-------------------------|-------------------------------------------------------------------------------------------------------------------------------------------|-----------------------------|------------------------------------------------------------------------------------------------------------------------------------------------------------------------------------------------------------------------------------|----------------------------------------------------------------|--------------------------|-------------------------------|---------------------------------|---------------------------------------------------------------------------------------------------------------------------------------------------------------------------------------------------------------------------------------------------------------------------------------------------------------------------------------------------------------------------|---------|---------------------------------------------------|-----------------------------------|-----------------------------------|-------------------------------------------------|------------------------|--------------------------------------------------------------------------------------------|------------------------------------------------------------------------------------------------------------------------|
|                    |         |                         | Exercise format                                                                                                                           | Supervision/<br>Facilitator | Exercise type                                                                                                                                                                                                                      | Intensity                                                      | Frequency<br>(Days/week) | Duration<br>/session<br>(min) | Intervention<br>time<br>(weeks) | Age<br>(year)                                                                                                                                                                                                                                                                                                                                                             |         |                                                   | BMI<br>(kg/m <sup>2</sup> )       | T2D<br>duration<br>(years)        |                                                 |                        |                                                                                            |                                                                                                                        |
| AminiLari<br>2017  | Iran    | 30<br>(15/15)           | Center-based and group-based: each exercise session consisted of three phases--warm up, the main stage and a cool-down period             | NR/NR                       | AE: cycle ergometer<br>RE: leg extension, prone leg curl, abdominal crunch                                                                                                                                                         | AE:<br>50–55% of<br>HR <sub>max</sub><br>RE:<br>50–55%<br>1 RM | 3                        | 45-70                         | 12                              | NR                                                                                                                                                                                                                                                                                                                                                                        |         | 0,12                                              | 45-60                             | EX<br>29.0±2.6<br>CON<br>28.2±3.7 | >2                                              | 6.7                    | HOMA-IR,<br>serum<br>insulin,<br>BMI                                                       | NR                                                                                                                     |
| Balducci<br>2010a  | Italy   | 606<br>(303/303)        | Center-based and group-based: in metabolic fitness center                                                                                 | Yes/Exercise specialist     | AE: treadmill, step, elliptical, cycle ergometer<br>RE: 4 resistance exercises (eg, chest press, lateral pull down, leg press, trunk flexion for the abdominals) and 3 stretching position<br>standard care: same as control group | Low~high intensity                                             | 2                        | 75                            | 48                              | Standard care (counseling and diet management)<br>Counseling: encouraging any type of commuting, occupational, home and leisure time physical activity, counseling was reinforced every 3 months;<br>Diet management: caloric intake reduction, adherence to diet was verified by using food diaries, and dietary prescriptions were adjusted at each intermediate visit. |         | 0,48                                              | EX<br>58.8±8.6<br>CON<br>58.8±8.5 | EX<br>31.2±4.6<br>CON<br>31.9±4.6 | 6(3–10)                                         | 7.1                    | HbA1c,<br>HOMA-IR,<br>serum<br>insulin,<br>SBP, DBP,<br>TG, TC,<br>HDL-C,<br>LDL-C,<br>BMI | Shoulder pain,<br>low back pain,<br>Aggravation of<br>pre-existing<br>osteoarthritis,<br>musculoskeletal<br>discomfort |
| Balducci<br>2010b  | Italy   | 42<br>(22/20)           | Center-based and group-based: NR                                                                                                          | Yes/NR                      | AE: treadmill, cycloergometer<br>RE: 4 resistance exercises (eg, chest press, lateral pull down, leg press, trunk flexion for the abdominals) and 3 stretching position<br>Dietary prescriptions                                   | AE:<br>70–80%<br>VO <sub>2max</sub><br>RE:<br>80% 1 RM         | 2                        | 60                            | 48                              | Dietary prescriptions                                                                                                                                                                                                                                                                                                                                                     |         | 0,12,24,<br>36,48                                 | EX<br>60.6±9.3<br>CON<br>61.1±7.1 | EX<br>30.5±0.9<br>CON<br>30.9±1.1 | EX<br>8.5±5.7<br>CON<br>7.8±5.2                 | 4.8                    | HbA1c,<br>HOMA-IR,<br>SBP, DBP,<br>TG, TC,<br>HDL-C,<br>LDL-C,<br>BMI                      | Musculo-<br>skeletal injury                                                                                            |
| Banitalebi<br>2019 | Iran    | 35<br>(17/18)           | Center-based and group-based: in a hospital gym                                                                                           | Yes/Exercise physiologists  | AE: treadmill, cycle ergometer<br>RE: bilateral leg press, lateral pull down, bench press, bilateral biceps curl, and bilateral triceps push down                                                                                  | AE:<br>60–70% of<br>HR <sub>max</sub><br>RE:<br>10-15 RM       | 3                        | 50                            | 10                              | Usual medical care and diabetes recommendations for self-management                                                                                                                                                                                                                                                                                                       |         | 0,10                                              | EX<br>54.1±5.4<br>CON<br>55.7±6.4 | EX<br>28.7±4.3<br>CON<br>30.1±3.5 | NR                                              | 20.0                   | HbA1c,<br>HOMA-IR,<br>serum<br>insulin,<br>BMI                                             | muscle soreness                                                                                                        |
| Bjorgaas<br>2005   | Norway  | 29<br>(15/14)           | Center-based and group-based: each exercise session consisted of three phases--warm up, the main stage, a cool-down and stretching period | Yes/Physio-therapist        | AE: light jogging, co-ordination exercises, knee bends and stretching<br>RE: NR<br>Diet information: same as control group                                                                                                         | 50–85%<br>HR <sub>max</sub>                                    | 2                        | 90                            | 12                              | Diet information: a plenary session by a clinical nutritionist                                                                                                                                                                                                                                                                                                            |         | 0,12                                              | EX<br>57.9±8.0<br>CON<br>56.9±7.8 | EX<br>31.7±2.6<br>CON<br>31.8±3.0 | EX<br>2.5<br>(0.1-17)<br>CON<br>1.5<br>(0.1-15) | 10.3                   | HbA1c,<br>SBP, DBP                                                                         | Achilles<br>tendinitis                                                                                                 |

| Author Year   | Country             | Sample size (EX/CON) | Exercise intervention                                                         |                                  |                                                                                                                                                                                                                                               |                                                |                                                         |                                                                 |                           | Control                                                                                                                                                                 | Time points of data collection (week) | Participant characteristics                 |                                                         |                                         | Dropout rate (%) | Outcomes                                                  | Adverse events                                                                   |
|---------------|---------------------|----------------------|-------------------------------------------------------------------------------|----------------------------------|-----------------------------------------------------------------------------------------------------------------------------------------------------------------------------------------------------------------------------------------------|------------------------------------------------|---------------------------------------------------------|-----------------------------------------------------------------|---------------------------|-------------------------------------------------------------------------------------------------------------------------------------------------------------------------|---------------------------------------|---------------------------------------------|---------------------------------------------------------|-----------------------------------------|------------------|-----------------------------------------------------------|----------------------------------------------------------------------------------|
|               |                     |                      | Exercise format                                                               | Supervision/ Facilitator         | Exercise type                                                                                                                                                                                                                                 | Intensity                                      | Frequency (Days/week)                                   | Duration /session (min)                                         | Intervention time (weeks) |                                                                                                                                                                         |                                       | Age (year)                                  | BMI (kg/m <sup>2</sup> )                                | T2D duration (years)                    |                  |                                                           |                                                                                  |
| Johansen 2017 | Zealand and Denmark | 98 (64/34)           | Group-based: the geographical location of the participants' home address      | Yes/ physiotherapist and trainer | AE: power walking, cycling, jogging uphill or on stairs<br>RE: anterior chain (thigh), posterior chain (thigh), chest, back and shoulders<br>standard care: same as control group                                                             | AE: 60–90% HR <sub>max</sub><br>RE: 10–12 RM   | 5-6                                                     | 30-60                                                           | 48                        | Standard care: medical counseling, education in type 2 diabetes, and lifestyle advice by the study nurse at baseline and every 3 months for 12months                    | 0,48                                  | EX<br>53.6±9.1<br>CON<br>56.6±8.1           | EX<br>31.4±3.9<br>CON<br>32.5±4.5                       | EX<br>5<br>(3-8)<br>CON<br>6<br>(3-9)   | 5.1              | HbA1c, serum insulin, SBP, DBP, TG, TC, HDL-C, LDL-C, BMI | Musculoskeletal pain or discomfort, mild hypotension, insomnia, peripheral edema |
| Leehey 2016   | USA                 | 36 (18/18)           | 12 weeks of center-based exercise followed by 40 weeks of home-based exercise | Yes/ Trainer                     | AE: treadmill, elliptical trainer and cycle ergometer<br>RE: using elastic bands, hand-held weights or weight machine<br>Diet management: same as control group                                                                               | AE: Interval RE: progressive                   | Center-based exercise: 3<br>Home-based exercise: 3 or 6 | Center-based: 80-90<br>Home-based: 60 (3 times) or 30 (6 times) | 52                        | Diet management: nutritional counseling session at baseline with 9 follow-up telephone calls                                                                            | 0,12,52                               | EX<br>65.4±8.7<br>CON<br>66.6±7.5           | EX<br>36.2±4.8<br>CON<br>37.4±4.2                       | NR                                      | 11.1             | HbA1c, SBP, TG, TC, HDL-C, LDL-C, BMI                     | Cardiovascular disease, cervical myelopathy                                      |
| Lucotti 2011  | Italy               | 50 (30/20)           | Center-based and group-based: in a hospital                                   | Yes/ Physician                   | AE: row ergometer and bicycle ergometer<br>RE: arm curls, military press, push-ups, upright rowing, back extension, squats knee extensions, heel raises and bent knee sit-ups<br>Diet management: same as control group                       | AE: 70% HR <sub>max</sub><br>RE: 40–50% of 1RM | 5                                                       | 45                                                              | 3                         | AE plus diet management:<br>AE: 70%HR max<br>5days/wk,30min/session;<br>Diet management: hypocaloric diet regime administered under a daily supervision of a dietician. | 0,3                                   | EX<br>61.5±11.5<br>CON<br>58.1±9.9          | EX<br>39.9±7.3<br>CON<br>38.8±4.5                       | NR                                      | 6.0              | HbA1c, SBP, DBP, TG, TC, HDL-C, BMI                       | NR                                                                               |
| Otten 2017    | Sweden              | 32 (16/16)           | Center-based: in a Sports Medicine unit                                       | Yes/ Trainer                     | AE: cross trainer, cycle-ergometer, cycle-ergometer<br>RE: leg presses, leg curls, hip raises, seated rows, dumbbell rows, shoulder raises, back extensions, burpees, sit-ups, and wall ball shots<br>Paleolithic diet: same as control group | AE: 40-100% HR <sub>max</sub><br>RE: NR        | 3                                                       | 60                                                              | 12                        | Paleolithic diet, education about the diet and cooked food by a trained dietician at baseline and once a month                                                          | 0,12                                  | EX<br>61<br>(58-66)<br>CON<br>60<br>(53-64) | EX<br>31.7<br>(29.2-35.4)<br>CON<br>31.4<br>(29.4-33.1) | EX<br>5.5<br>(1-8)<br>CON<br>3<br>(1-5) | 9.4              | HbA1c, serum insulin, SBP, DBP, TG, TC, HDL-C, LDL-C      | NR                                                                               |
| Vinetti 2015  | Italy               | 20 (10/10)           | Center-based: in a hospital-based setting                                     | Yes/ Trainer                     | AE: cycling on mechanically braked cycle ergometers<br>RE: major muscle groups (upper limb, lower limb, chest, back and core), using calisthenics, repetitions with ankle weights, and dumbbells<br>Standard care: same as control group      | AE: Interval RE: progressive                   | NR                                                      | 55-85                                                           | 48                        | Standard care: dietary regimen prescribed by the diabetologist                                                                                                          | 0,48                                  | EX<br>60.56<br>±5.94<br>CON<br>57.5±9.46    | EX<br>29.7±4.1<br>CON<br>29.2±3.11                      | ≥2                                      | 0                | HbA1c, serum insulin, SBP, DBP, TG, TC, HDL-C, BMI        | NR                                                                               |

Abbreviations: RCT, randomized controlled trial; T2D, type 2 Diabetes; EX, exercise group; CON, control group; AE, aerobic exercise; RE, resistance exercise; NR: not reported; RM: repetition maximum; HR: heart rate; VO<sub>2max</sub>: maximal oxygen consumption; HbA1c, hemoglobin A1c; HOMA-IR, homeostasis model assessment of insulin resistance; BMI, body mass index; SBP, systolic blood pressure; DBP, diastolic blood pressure; TG, triglycerides; TC, total cholesterol; HDL-C, high-density lipoprotein cholesterol; LDL-C, low-density lipoprotein cholesterol.

## Quality of the included studies

Figure 2 shows the quality assessment of the included studies: six studies were judged to have a low risk of bias,<sup>14-19</sup> while the remaining four studies showed uncertain risk of bias.<sup>20-23</sup> The following were main sources of bias: lack of blinding of participants and personnel, absence of random sequence generation and allocation concealment, and incomplete outcome data. In summary, the quality of the included studies was considered as having moderate risk of bias.

## Pooled results

### (1) Glycemic control (HbA1c)

Nine studies provided data about the effect of combined exercise on HbA1c. The pooled results showed the combined intervention significantly reduced the HbA1c level of participants, favoring the intervention group, as compared with the control group (MD=-0.16%, 95%CI: -0.28 to -0.05, P=0.006) (Figure 3).

### (2) Weight loss (BMI)

Eight studies reported changes in BMI. The pooled results showed that combined exercise significantly reduced BMI in the intervention group as opposed to the control group (MD=-0.98 kg/m<sup>2</sup>, 95%CI: -1.41 to -0.56, P<0.001) (Figure 3).

### (3) Insulin sensitivity (HOMA-IR, serum insulin)

Four of the 10 studies examined the effectiveness of combined exercise on the HOMA-IR index. The pooled result revealed a significant reduction in the HOMA-IR index favoring the intervention group (MD=-1.19, 95%CI: -1.93 to -0.46, P=0.001) (Figure 4).

Six studies examined serum insulin. The difference in mean of serum insulin significantly

1  
2  
3  
4 favored the intervention group (MD=-2.18  $\mu$ IU/mL, 95%CI: -2.99 to -1.37, P<0.001) (Figure  
5  
6  
7 4).

#### 9 **(4) Blood pressure (SBP and DBP)**

11  
12 Eight of the 10 studies measured SBP and seven studies measured DBP. The pooled results  
13  
14 showed no difference in SBP between the intervention and control groups (MD=-2.33 mmHg,  
15  
16 95%CI: -6.01 to 1.35, P=0.21), whereas there was a significant reduction in DBP favoring the  
17  
18 intervention group (MD=-3.24 mmHg, 95%CI: -5.32 to -1.16, P=0.002) (Figure 5).  
19  
20  
21

#### 22 **(5) Serum lipids (TG, TC, HDL-C, and LDL-C)**

23  
24 Seven studies measured the effectiveness of combined exercise on lipid profiles. The pooled  
25  
26 results demonstrated that combined exercise had no significant effect on TG, TC, HDL-C, and  
27  
28 LDL-C levels (TG: MD=-7.57 mg/dL, 95%CI: -16.42 to 1.28, P=0.09; TC: MD=-8.29 mg/dL,  
29  
30 95%CI: -22.18 to 5.60, P=0.24; HDL-C: MD= 2.69 mg/dL, 95%CI: -0.72 to 6.10, P=0.12;  
31  
32 LDL-C: MD=0.14 mg/dL, 95%CI: -19.87 to 20.14, P=0.99) (Figure 6).  
33  
34  
35  
36  
37

#### 38 **Subgroup analysis (exercise frequency)**

39  
40 The results showed that combined exercise with frequency <3 days/week significantly  
41  
42 lowered the HbA1c (MD=-0.31%, 95%CI: -0.50 to -0.13, P<0.001) and BMI (MD=-1.03  
43  
44 kg/m<sup>2</sup>, 95%CI: -1.49 to -0.57, P<0.001), while combined exercise with frequency  $\geq$ 3 days/week  
45  
46 had no effect on HbA1c (MD=0.03%, 95%CI: -0.45 to 0.51, P=0.90) and BMI (MD=0.18  
47  
48 kg/m<sup>2</sup>, 95%CI: -1.34 to 1.71, P=0.81) (Table 2).  
49  
50  
51  
52  
53  
54  
55  
56  
57  
58  
59  
60

**Table 2.** Subgroup analysis on primary outcomes

| Subgroups          | HbA1c          |             |             |                 |                     |                       | BMI            |             |             |                 |                     |                       |     |
|--------------------|----------------|-------------|-------------|-----------------|---------------------|-----------------------|----------------|-------------|-------------|-----------------|---------------------|-----------------------|-----|
|                    | Included study | Sample size | Sample size | Mean Difference | <i>P</i>            | <i>I</i> <sup>2</sup> | Included study | Sample size | Sample size | Mean Difference | <i>P</i>            | <i>I</i> <sup>2</sup> |     |
|                    | (n)            | (EX)        | (CON)       | (95% CI)        |                     |                       | (n)            | (EX)        | (CON)       | (95% CI)        |                     |                       |     |
| Exercise frequency | <3             | 3           | 321         | 306             | -0.31(-0.50, -0.13) | <0.001                | 0%             | 2           | 310         | 295             | -1.03(-1.49, -0.57) | <0.001                | 36% |
| (days/week)        | ≥3             | 3           | 44          | 55              | 0.03(-0.45, 0.51)   | 0.90                  | 0%             | 4           | 57          | 70              | 0.18(-1.34, 1.71)   | 0.81                  | 0%  |

Abbreviations: EX, exercise group; CON, control group; CI = confidence intervals; *I*<sup>2</sup> = I-squared.

## Discussion

The results from this meta-analysis showed that combined exercise was associated with a significant decline in HbA1c, BMI, HOMA-IR index, serum insulin, and DBP, indicating the important role of combined exercise in improving glycemic and weight control and enhancing insulin sensitivity among patients with T2D and concurrent overweight/obesity. However, the results showed that combined exercise had no effect on serum lipids.

Our results showed that combined exercise had a significant effect on HbA1c among adults with T2D and concurrent overweight/obesity. It is important to mention that a 1% absolute reduction in HbA1c is associated with a 21% reduction in the risk of any end point or death related to diabetes.<sup>24</sup> Previous meta-analyses of exercise in diabetic patients with or without overweight/obesity have found a positive effect on glycemic control. Hou<sup>25</sup> assessed the effect of combined exercise compared with aerobic exercise among patients with T2D. Their results showed a significant reduction of HbA1c by 0.31%, which was comparable with our finding that combined exercise decreased HbA1c by 0.16%. The meta-analysis by Zou<sup>26</sup> identified 13 eligible studies investigating the effect of exercise on patients with T2D and obesity, and the result showed that exercise had no effect on HbA1c in the 3 months intervention subgroup, whereas exercise significantly reduced HbA1c by 0.25%, 0.93%, and 0.26% when intervention duration were 4 months, 6 months, and 12months, respectively. This may indicate the effect of exercise in patients with type 2 diabetes and obesity tends to be steady and persistent. The pooled effect of combined exercise in patients with T2D and concurrent overweight/obesity, however, seems to be much lower than that reported in the



1  
2  
3  
4  
5 first adequately powered RCT<sup>27</sup> that examined the effects of aerobic, resistance, and  
6  
7  
8 combined exercise in people with T2D. Sigal and colleagues<sup>27</sup> found a pronounced reduction  
9  
10 (0.9%) in HbA1c with combined exercise. Such discrepancy might be attributed to the long  
11  
12 exercise duration (210–270 min/week) of the combined exercise program, in which  
13  
14 participants performed intensive aerobic training program (75–135min/week) as well as  
15  
16 resistance training program (135min/week).<sup>28</sup>  
17  
18  
19

20  
21 Our results showed that combined exercise exerted a significant effect on insulin  
22  
23 sensitivity on patients with T2D and concurrent overweight/obesity, which was in line with  
24  
25 the results of Thaane<sup>29</sup>, wherein exercise appeared to improve insulin sensitivity among  
26  
27 adults with T2D and concurrent overweight/obesity. Way<sup>30</sup> also found that regular exercise  
28  
29 had a significant benefit in insulin sensitivity in adults with T2D. They concluded this by  
30  
31 synthesizing the outcomes of clamps, insulin infusion sensitivity tests, insulin tolerance test,  
32  
33 and oral glucose tolerance test. The results of Way<sup>30</sup> indicated that the durability of training-  
34  
35 induced improvement in insulin sensitivity could persist beyond 72 hours after the last  
36  
37 exercise session. However, potential heterogeneity was introduced by diverse measurement  
38  
39 techniques for insulin sensitivity.  
40  
41  
42  
43  
44  
45  
46

47 It is generally more difficult for patients with diabetes to lose weight and/or maintain  
48  
49 weight loss than nondiabetic individuals. Our results showed that combined exercise achieved  
50  
51 a statistically and clinically significant decrease in BMI among adults with T2D and  
52  
53 concurrent overweight/obesity. Previous reviews also showed the effect of combined exercise  
54  
55 on weight loss by using other obesity indicators. The review by Hou<sup>25</sup> showed that combined  
56  
57  
58  
59  
60



1  
2  
3  
4  
5 exercise significantly reduced subcutaneous and visceral adipose tissue and the results of  
6  
7  
8 Pan<sup>31</sup> showed that combined exercise safely accentuated reduction in body weight. While the  
9  
10 results of Thaane<sup>29</sup> suggested that short-term exercise training exerted no significant effect on  
11  
12  
13 body weight, BMI, and body fat.

14  
15  
16 Cardiovascular disease was one of the leading reasons for frequent medical consultation  
17  
18 and rehospitalization for adults with T2D and concurrent overweight/obesity.<sup>32</sup> BP and serum  
19  
20 lipids are vital risk factors for cardiovascular disease, and the importance of managing and  
21  
22 maintaining blood pressure and cholesterol levels has been emphasized by the American  
23  
24 Diabetic Association (ADA) guideline.<sup>33</sup> Evidence has shown the benefits of simultaneous  
25  
26 control of HbA1c, BP, and lipid levels. Our study found that combined exercise had no effect  
27  
28 on SBP and serum lipids, which was contradictory to the findings of Albalawi<sup>34</sup> and  
29  
30 Bersaoui<sup>35</sup>, who reported that combined exercise was related to a statistically significant  
31  
32 decline in BP and lipid control among patients with T2D. The possible reason for the  
33  
34 discrepancy may be related to the differences of participants' characteristics. In the current  
35  
36 meta-analysis, participants had T2D and were overweight or obese. Low-grade metabolic  
37  
38 inflammation in this group of people can induce changes in the neural mechanisms (e.g.,  
39  
40 hypothalamic-pituitary-adrenal axis), which in turn damage the cognitive function of  
41  
42 individuals. Cognitive impairments further attenuate individuals' motivation and ability to  
43  
44 engage in self-management activities and maintain therapeutic lifestyles.<sup>36-39</sup> Hence,  
45  
46 combined exercise may have limited effect on BP and lipid control in people with T2D and  
47  
48 concurrent overweight/obesity. More strategies need to be explored to help patients with T2D  
49  
50  
51  
52  
53  
54  
55  
56  
57  
58  
59  
60

1  
2  
3  
4  
5 and concurrent overweight/obesity to simultaneously manage HbA1c, BP, and cholesterol  
6  
7  
8 levels.  
9

10 Exercise frequency is a pivotal determinant which moderates the effect of combined  
11  
12 exercise on glycemic control in patients with T2D and concurrent overweight/obesity.<sup>40 41</sup>

13  
14 Our study showed that combined exercise had significant effects on HbA1c and BMI only in  
15  
16 subgroup with exercise frequency less than 3 days/week. We would attribute such results to  
17  
18 inherent differences between studies with exercise frequency <3 days/week and  $\geq 3$   
19  
20 days/week. Specifically, subjects in the studies with exercise frequency more than 3  
21  
22 days/week tended to perform short-duration exercise (3 weeks, 12 weeks), which was likely  
23  
24 not enough to make a difference in outcomes. While subjects<sup>14 15 23</sup> in the study with exercise  
25  
26 frequency less than 3 days/week had been offered with long-term (48 weeks) exercise under  
27  
28 supervision. Long-term exercise sessions and professional supervision were identified as  
29  
30 important factors associated with prominent improvement of glycemic and weight control.<sup>26</sup>  
31  
32  
33  
34  
35  
36  
37  
38  
39  
40  
41  
42  
43  
44  
45  
46  
47  
48  
49  
50  
51  
52  
53  
54  
55  
56  
57  
58  
59  
60

31 Additionally, Balducci<sup>14 15</sup> even implemented diet management in addition to physical  
activity counseling. Thus, the results of subgroup analysis should be interpreted with caution.

### **Direction for future research and practice**

Considering the benefits of combined exercise, it might be helpful to recommend  
combined exercise for patients with T2D and concurrent overweight/obesity to improve  
glycemic and weight control and decrease insulin resistance. Physical activity counseling,  
psycho-educational interventions, mobile technologies, and peer support groups could be  
integrated into the exercise to improve the adoption rate of combined exercise.<sup>42</sup> Although

1  
2  
3  
4  
5 there are ADA, American College of Sports Medicine, and International Diabetes Federation  
6  
7  
8 exercise recommendations for diabetic patients,<sup>8 9 43</sup> there is little evidence to indicate the  
9  
10 ideal exercise duration, exercise intensity, and exercise time that would be most appropriate  
11  
12 for patients with T2D and concurrent overweight/obesity. Optimal exercise frequency and  
13  
14 duration that would be beneficial for patients with T2D and concurrent overweight/obesity  
15  
16 requires further investigation. According to the features of effective exercise interventions  
17  
18 among the included studies, most research studies performed center-based exercise with  
19  
20 supervision. Hence, we recommend this kind of intervention in future studies to achieve  
21  
22 greater metabolic effects.  
23  
24  
25  
26  
27

### 28 **Limitations**

29  
30  
31 Our study has some limitations. First, the intervention components of combined exercise  
32  
33 in terms of intervention frequency, intensity, duration, and time were inconsistent among the  
34  
35 included studies and there was substantial heterogeneity among the trials in the meta-  
36  
37 analysis. The results, therefore, should be interpreted with caution. Second, only 10 studies  
38  
39 met the inclusion criteria and were eligible for the meta-analysis. Some well-conducted and  
40  
41 important RCTs were excluded because of not focusing on combined exercise or targeting  
42  
43 patients with T2D and concurrent overweight/obesity.<sup>27 44 45</sup> Third, the effectiveness of  
44  
45 combined exercise observed in this meta-analysis should be interpreted with caution as the  
46  
47 majority of the participants ( ~ 62%) included in this analysis were from a single study called  
48  
49 the “IDES study” with significant positive findings.<sup>11</sup> Additionally, the patients in our study  
50  
51 were mainly middle-aged and elderly subjects; hence, the effect of combined exercise on  
52  
53  
54  
55  
56  
57  
58  
59  
60

1  
2  
3  
4  
5 young subjects with T2D and concurrent overweight/obesity remains unclear. Finally, the  
6  
7  
8 T2D duration varied from 0.1 to 17 years or more and which subgroup of patients could  
9  
10 benefit more from the combined exercise remains unclear.  
11  
12

### 13 **Conclusions**

14  
15  
16 This systematic review provides useful information for the clinical application of the  
17  
18 combined exercise in the management of patients with T2D and concurrent  
19  
20 overweight/obesity. The results show clear evidence that combined exercise intervention has  
21  
22 positive effects on improving glycemic and weight control, and enhancing insulin sensitivity  
23  
24 among patients with T2D and concurrent overweight/obesity. More RCTs with robust  
25  
26 methodological design, and more comprehensive body composition measurements are needed  
27  
28 to elaborate the intervention effects and mechanism. This review also highlights the need for  
29  
30 further studies to investigate the ideal duration, intensity, and time of combined exercise for  
31  
32 patients with T2D and concurrent overweight/obesity.  
33  
34  
35  
36  
37  
38  
39  
40

41 **Contributors** XZ, QH, YZ, LC conceived the research; XZ, QH, YZ, LC established  
42  
43 eligibility criteria and Search strategy; XZ, QH worked on literature selection, data extraction  
44  
45 and quality assessment; XZ, QH, LC performed statistical analysis; XZ wrote paper; XZ, LC  
46  
47 had primary responsibility for final content; All authors read the manuscript and approved the  
48  
49 final draft.

50  
51 **Funding** This work was supported by National Natural Science Foundation of China (grant  
52  
53 number: 71904214) and Medical Science and Technology Research Foundation of  
54  
55 Guangdong Province (grant number: A2019003).

56  
57 **Competing interests** None declared.

58  
59 **Ethics statement** This study does not require ethics approval as it is a review based on  
60

1  
2  
3  
4  
5 published studies.

6  
7 **Data availability statement** All data relevant to the study are included in the article or  
8  
9 uploaded as supplementary information. No additional data available.

## 10 11 12 13 **References**

- 14  
15  
16 1 International Diabetes Federation. IDF Diabetes Atlas. Ninth edition. 2019.
- 17  
18 2 World Health Organization. Overweight and Obesity. Available:  
19  
20 [https://www.who.int/gho/ncd/risk\\_factors/overweight\\_text/en/](https://www.who.int/gho/ncd/risk_factors/overweight_text/en/).
- 21  
22  
23 3 Colosia AD, Palencia R, Khan S. Prevalence of hypertension and obesity in patients with  
24  
25 type 2 diabetes mellitus in observational studies: a systematic literature review. *Diabetes,*  
26  
27 *metabolic syndrome and obesity: targets and therapy* 2013;6, 327-338.
- 28  
29  
30 4 Caspersen CJ, Powell KE, Christenson GM. Physical activity, exercise, and physical  
31  
32 fitness: definitions and distinctions for health-related research. *Public health reports*  
33  
34 (Washington, D.C.: 1974). 1985; 100(2), 126-131.
- 35  
36  
37 5 Colberg SR, Sigal RJ, Yardley JE, *et al*. Physical Activity/Exercise and Diabetes: A  
38  
39 Position Statement of the American Diabetes Association. *Diabetes Care*. 2016; 39 (11),  
40  
41 2065-2079.
- 42  
43  
44 6 Hurst C, Weston KL, McLaren SJ, *et al*. The effects of same-session combined exercise  
45  
46 training on cardiorespiratory and functional fitness in older adults: a systematic review and  
47  
48 meta-analysis. *Aging Clin Exp Res*. 2019; 31 (12), 1701-1717.
- 49  
50  
51 7 American Diabetes Association. 3. Prevention or delay of type 2 diabetes: Standards of  
52  
53 Medical Care in Diabetes-2020. *Diabetes Care*, 43(Suppl. 1). 2020; S32–S36.
- 54  
55  
56  
57  
58  
59  
60

- 1  
2  
3  
4  
5  
6  
7  
8 American Diabetes Association. 5. Lifestyle Management: Standards of Medical Care in  
9  
10  
11  
12  
13  
14  
15  
16  
17  
18  
19  
20  
21  
22  
23  
24  
25  
26  
27  
28  
29  
30  
31  
32  
33  
34  
35  
36  
37  
38  
39  
40  
41  
42  
43  
44  
45  
46  
47  
48  
49  
50  
51  
52  
53  
54  
55  
56  
57  
58  
59  
60
- 8 American Diabetes Association. 5. Lifestyle Management: Standards of Medical Care in  
Diabetes-2019. *Diabetes Care*, 42(Suppl 1). 2019; S46-S60.
- 9 Colberg SR, Sigal RJ, Fernhall B, *et al.* Exercise and type 2 diabetes: the American College  
of Sports Medicine and the American Diabetes Association: joint position statement  
executive summary. *Diabetes Care*. 2010;33(12):2692-2696.
- 10 Page MJ, McKenzie JE, Bossuyt PM, *et al.* The PRISMA 2020 statement: an updated  
guideline for reporting systematic reviews. *BMJ*. 2021;372: n71.
- 11 World Health Organization. Obesity and overweight. 2020. Available:  
<https://www.who.int/news-room/fact-sheets/detail/obesity-and-overweight>.
- 12 Oliveira C, Simoes M, Carvalho J, *et al.* Combined exercise for people with type 2  
diabetes mellitus: A systematic review. *Diabetes Research and Clinical Practice*. 2012;  
98(2), 187-198.
- 13 Cochrane Handbook for Systematic Reviews of Interventions Version 5.1.0. In Higgins  
JPT, Green LA, (Eds), *The Cochrane Collaboration* (p.174-219). 2011.
- 14 Balducci S, Zanuso S, Nicolucci A, *et al.* Effect of an intensive exercise intervention  
strategy on modifiable cardiovascular risk factors in subjects with type 2 diabetes mellitus:  
a randomized controlled trial: the Italian Diabetes and Exercise Study (IDES). *Arch Intern  
Med*. 2010; 170(20), 1794-1803.
- 15 Balducci S, Zanuso S, Nicolucci A, *et al.* Anti-inflammatory effect of exercise training in  
subjects with type 2 diabetes and the metabolic syndrome is dependent on exercise  
modalities and independent of weight loss. *Nutrition Metabolism and Cardiovascular*

- 1  
2  
3  
4  
5  
6  
7  
8  
9  
10  
11  
12  
13  
14  
15  
16  
17  
18  
19  
20  
21  
22  
23  
24  
25  
26  
27  
28  
29  
30  
31  
32  
33  
34  
35  
36  
37  
38  
39  
40  
41  
42  
43  
44  
45  
46  
47  
48  
49  
50  
51  
52  
53  
54  
55  
56  
57  
58  
59  
60
- Diseases*. 2010; 20(8), 608-617.
- 16 Banitalebi E, Kazemi A, Faramarzi M, *et al*. Effects of sprint interval or combined aerobic and resistance training on myokines in overweight women with type 2 diabetes: A randomized controlled trial. *Life Sciences*. 2019; 217, 101-109.
- 17 Leehey DJ, Collins E, Kramer HJ, *et al*. Structured Exercise in Obese Diabetic Patients with Chronic Kidney Disease: A Randomized Controlled Trial. *American Journal of Nephrology*. 2016; 44(1), 54-62.
- 18 Lucotti P, Monti LD, Setola E, *et al*. Aerobic and resistance training effects compared to aerobic training alone in obese type 2 diabetic patients on diet treatment. *Diabetes Research and Clinical Practice*. 2011; 94(3), 395-403.
- 19 Otten J, Stomby A, Waling M, *et al*. Benefits of a Paleolithic diet with and without supervised exercise on fat mass, insulin sensitivity, and glycemic control: a randomized controlled trial in individuals with type 2 diabetes. *Diabetes-Metabolism Research and Reviews*. 2017; 33(1).
- 20 AminiLari Z, Fararouei M, Amanat S, *et al*. The Effect of 12 Weeks Aerobic, Resistance, and Combined Exercises on Omentin-1 Levels and Insulin Resistance among Type 2 Diabetic Middle-Aged Women. *Diabetes Metab J*. 2017; 41(3), 205-212.
- 21 Bjorgaas M, Vik JT, Saeterhaug A, *et al*. Relationship between pedometer-registered activity, aerobic capacity and self-reported activity and fitness in patients with type 2 diabetes. *Diabetes Obes Metab*. 2005; 7(6), 737-744.
- 22 Johansen MY, MacDonald CS, Hansen KB, *et al*. Effect of an Intensive Lifestyle

- 1  
2  
3  
4  
5 Intervention on Glycemic Control in Patients with Type 2 Diabetes A Randomized Clinical  
6  
7  
8 Trial. *Jama-Journal of the American Medical Association*. 2017; 318(7), 637-646.  
9
- 10 23 Vinetti G, Mozzini C, Desenzani P, *et al*. Supervised exercise training reduces oxidative  
11  
12 stress and cardiometabolic risk in adults with type 2 diabetes: a randomized controlled  
13  
14 trial. *Sci Rep*. 2015; 5, 9238.  
15  
16
- 17 24 Stratton IM, Adler AI, Neil HA, *et al*. Association of glycaemia with macrovascular and  
18  
19 microvascular complications of type 2 diabetes (UKPDS 35): prospective observational  
20  
21 study. *BMJ (Clinical research ed)*. 2000;321(7258):405-12.  
22  
23  
24
- 25 25 Hou Y, Lin L, Li W, *et al*. Effect of combined training versus aerobic training alone on  
26  
27 glucose control and risk factors for complications in type 2 diabetic patients: a meta-  
28  
29 analysis. *International Journal of Diabetes in Developing Countries*. 2015; 35(4), 524-532.  
30  
31  
32
- 33 26 Zou Z, Cai W, Cai M, *et a*. Influence of the intervention of exercise on obese type II  
34  
35 diabetes mellitus: A meta-analysis. *Prim Care Diabetes*. 2016; 10(3), 186-201.  
36  
37  
38
- 39 27 Sigal RJ, Kenny GP, Boulé NG, *et al*. Effects of aerobic training, resistance training, or  
40  
41 both on glycemic control in type 2 diabetes: a randomized trial. *Ann Intern Med*.  
42  
43 2007;147(6):357-369.  
44  
45  
46
- 47 28 Larose J, Sigal RJ, Khandwala F, *et al*. Associations between physical fitness and  
48  
49 HbA<sub>1c</sub> in type 2 diabetes mellitus. *Diabetologia*. 2011;54(1):93-102.  
50  
51
- 52 29 Thaane T, Motala AA, McKune AJ. Effects of Short-Term Exercise in Overweight/Obese  
53  
54 Adults with Insulin Resistance or Type 2 Diabetes: A Systematic Review of Randomized  
55  
56 Controlled Trials. *Journal of Diabetes & Metabolism*. 2018; 9(12).  
57  
58  
59  
60



- 1  
2  
3  
4  
5 30 Way KL, Hackett DA, Baker MK, *et al.* The Effect of Regular Exercise on Insulin  
6  
7  
8 Sensitivity in Type 2 Diabetes Mellitus: A Systematic Review and Meta-Analysis.  
9  
10  
11 *Diabetes Metab J.* 2016; 40(4), 253-271.  
12
- 13 31 Pan B, Ge L, Xun Y, *et al.* Exercise training modalities in patients with type 2 diabetes  
14  
15 mellitus: a systematic review and network meta-analysis. *International Journal of*  
16  
17 *Behavioral Nutrition and Physical Activity.* 2018; 15.  
18  
19
- 20 32 Costanzo P, Cleland JGF, Pellicori P, *et al.* The Obesity Paradox in Type 2 Diabetes  
21  
22 Mellitus: Relationship of Body Mass Index to Prognosis A Cohort Study. *Annals of*  
23  
24 *Internal Medicine.* 2015; 162(9), 610-U208.  
25  
26  
27
- 28 33 American Diabetes Association. Cardiovascular Disease and Risk Management: Standards  
29  
30 of Medical Care in Diabetes-2020. *Diabetes Care.* 2020; 43, S111-S134.  
31  
32
- 33 34 Albalawi H, Coulter E, Ghouri N, *et al.* The effectiveness of structured exercise in the  
34  
35 south Asian population with type 2 diabetes: a systematic review. *Physician and*  
36  
37 *Sportsmedicine.* 2017; 45(4), 408-417.  
38  
39  
40
- 41 35 Bersaoui M, Baldew SSM, Cornelis N, *et al.* The effect of exercise training on blood  
42  
43 pressure in African and Asian populations: A systematic review and meta-analysis of  
44  
45 randomized controlled trials. *European Journal of Preventive Cardiology.* 2020; 27(5),  
46  
47 457-472.  
48  
49  
50
- 51 36 Lowe CJ, Reichelt AC, Hall PA. The Prefrontal Cortex and Obesity: A Health  
52  
53 Neuroscience Perspective. *Trend Cogn Sci.* 2019;23(4):349-61.  
54  
55  
56
- 57 37 Castanon N, Luheshi G, Layé S. Role of neuroinflammation in the emotional and  
58  
59  
60

- 1  
2  
3  
4  
5 cognitive alterations displayed by animal models of obesity. *Front Neurosci.* 2015; 9:229.  
6  
7  
8 38 Ottino-González J, Jurado MA, García-García I, *et al.* Allostatic load and executive  
9  
10 functions in overweight adults. *Psychoneuroendocrinology.* 2019; 106:165-70.  
11  
12  
13 39 Cai X, Hu D, Pan C, *et al.* The risk factors of glycemic control, blood pressure control,  
14  
15 lipid control in Chinese patients with newly diagnosed type 2 diabetes\_A nationwide  
16  
17 prospective cohort study. *Sci Rep.* 2019;9.  
18  
19  
20 40 Umpierre D, Ribeiro PAB, Schaan BD, *et al.* Volume of supervised exercise training  
21  
22 impacts glycaemic control in patients with type 2 diabetes: a systematic review with meta-  
23  
24 regression analysis. *Diabetologia.* 2013; 56(2), 242-251.  
25  
26  
27  
28 41 Cradock KA, O'Leary G, Finucane FM, *et al.* Behaviour change techniques targeting both  
29  
30 diet and physical activity in type 2 diabetes: A systematic review and meta-analysis.  
31  
32  
33 *International Journal of Behavioral Nutrition and Physical Activity.* 2017; 14.  
34  
35  
36 42 Fletcher GF, Landolfo C, Niebauer J, *et al.* Promoting Physical Activity and Exercise  
37  
38 JACC Health Promotion Series. *Journal of the American College of Cardiology.* 2018;  
39  
40 72(14), 1622-1639.  
41  
42  
43  
44 43 Aschner P. New IDF clinical practice recommendations for managing type 2 diabetes in  
45  
46 primary care. *Diabetes Res Clin Pract.* 2017; 132, 169-170.  
47  
48  
49 44 Church TS, Blair SN, Cocreham S, *et al.* Effects of aerobic and resistance training on  
50  
51 hemoglobin A1c levels in patients with type 2 diabetes: a randomized controlled trial.  
52  
53  
54 *JAMA.* 2010;304(20):2253-2262.  
55  
56  
57 45 Cuff DJ, Meneilly GS, Martin A, *et al.* Effective exercise modality to reduce insulin  
58  
59  
60

1  
2  
3  
4  
5 resistance in women with type 2 diabetes. *Diabetes Care*. 2003; 26:2977–82.  
6  
7

## 8 **Figure Captions**

9

10 **Figure 1** Flow chart for study selection according to PRISMA Declaration 2009

11  
12  
13 **Figure 2** Quality assessment of the included studies. (A) as percentages across all included  
14 studies in risk of bias graph; (B) Bias risk of the included studies. “+” indicates Low risk of  
15 bias; “?” represents unclear risk of bias; “-” indicates high risk of bias.  
16  
17  
18  
19

20  
21 **Figure 3** Comparison of HbA1c and body mass index (BMI) between intervention group and  
22 control group in patients with T2D and concurrent overweight/obesity. (A) Forest plot of  
23 HbA1c; (B) Forest plot of BMI; Unit of HbA1c is “%”. Unit of BMI is “kg/m<sup>2</sup>”.  
24  
25  
26  
27

28  
29 **Figure 4** Comparison of homeostasis model assessment of insulin resistance (HOMA-IR) and  
30 serum insulin between intervention group and control group in patients with T2D and  
31 concurrent overweight/obesity. (A) Forest plot of HOMA-IR; (B) Forest plot of serum insulin.  
32  
33  
34  
35  
36  
37  
38  
39  
40  
41  
42  
43  
44  
45  
46  
47  
48  
49  
50  
51  
52  
53  
54  
55  
56  
57  
58  
59  
60

60  
**Figure 5** Comparison of systolic blood pressure (SBP) and diastolic blood pressure (DBP)  
between intervention group and control group in patients with T2D and concurrent  
overweight/obesity. (A) Forest plot of SBP; (B) Forest plot of DBP. Units of SBP and DBP are  
both “mmHg”.

**Figure 6** Comparison of triglycerides (TG), total cholesterol (TC), high-density lipoprotein  
cholesterol (HDL-C) and low-density lipoprotein cholesterol (LDL-C) between intervention  
group and control group in patients with T2D and concurrent overweight/obesity. (A) Forest  
plot of TG; (B) Forest plot of TC; (C) Forest plot of HDL-C; (D) Forest plot of LDL-C. Units

1  
2  
3  
4  
5 of TG, TC, HDL-C and LDL-C are “mg/dL”.  
6  
7  
8  
9  
10  
11  
12  
13  
14  
15  
16  
17  
18  
19  
20  
21  
22  
23  
24  
25  
26  
27  
28  
29  
30  
31  
32  
33  
34  
35  
36  
37  
38  
39  
40  
41  
42  
43  
44  
45  
46  
47  
48  
49  
50  
51  
52  
53  
54  
55  
56  
57  
58  
59  
60

For peer review only

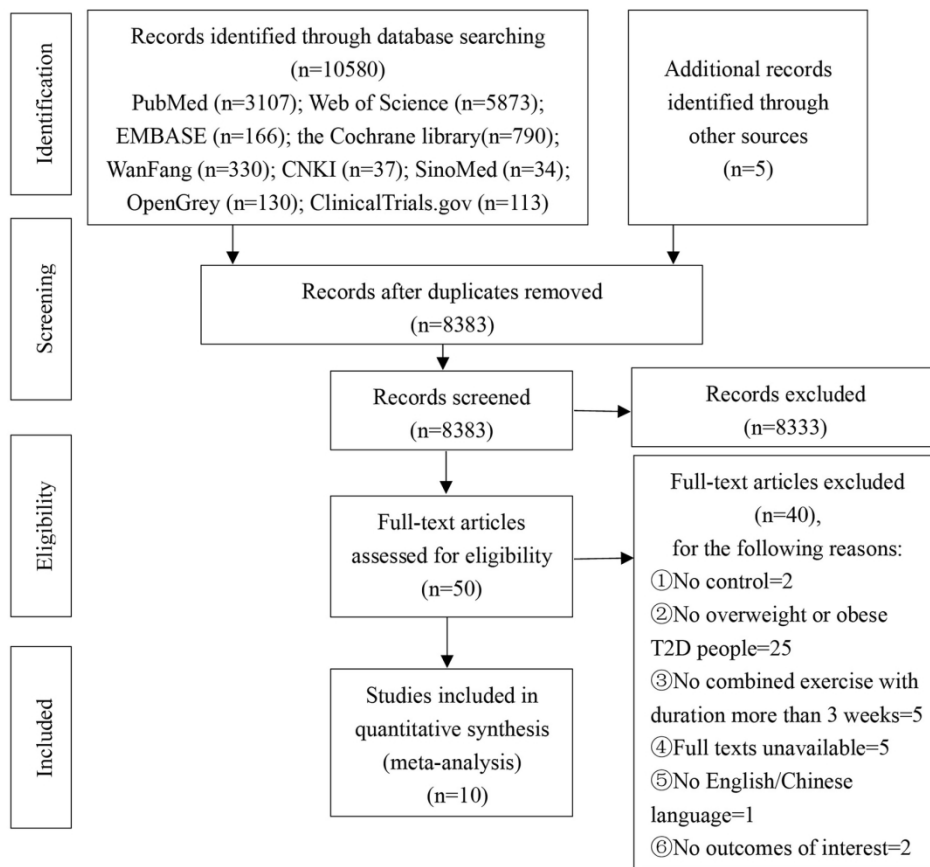

Figure 1 Flow chart for study selection according to PRISMA Declaration 2009

165x147mm (300 x 300 DPI)

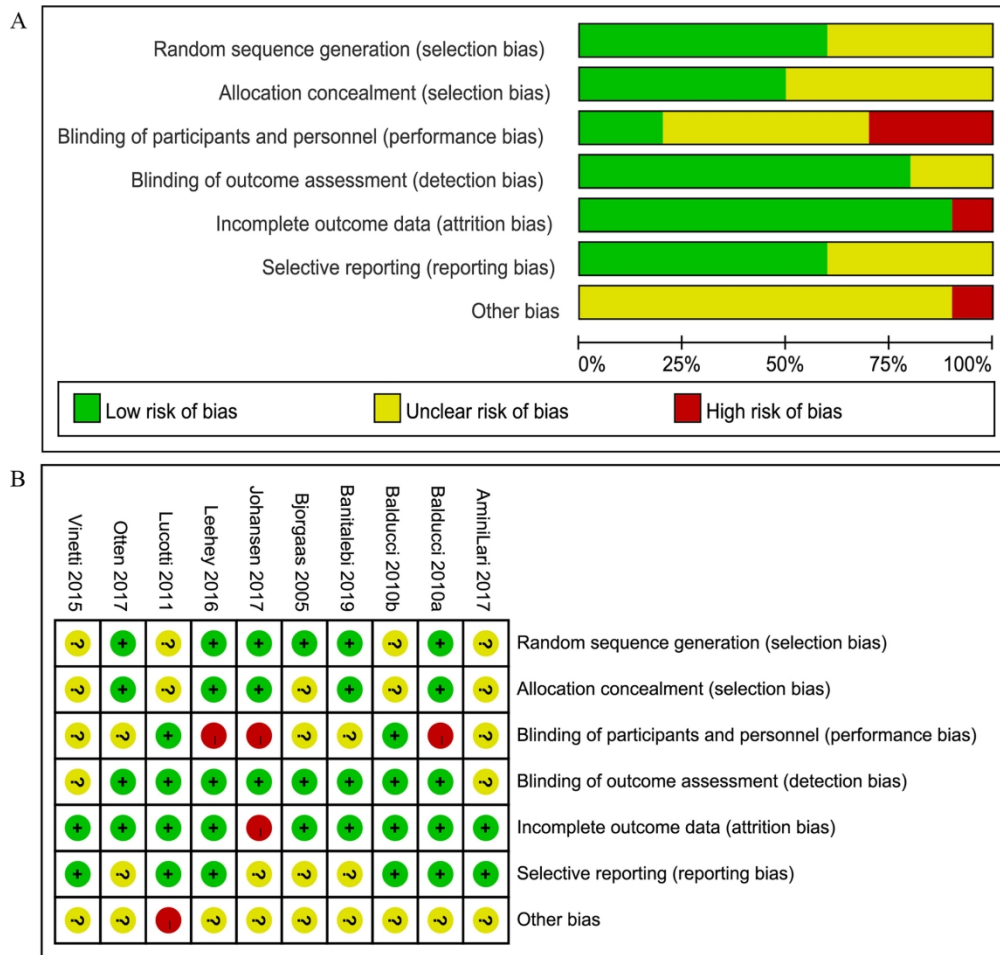

Figure 2 Quality assessment of the included studies. (A) as percentages across all included studies in risk of bias graph; (B) Bias risk of the included studies. "+" indicates Low risk of bias; "?" represents unclear risk of bias; "-" indicates high risk of bias.

177x169mm (300 x 300 DPI)

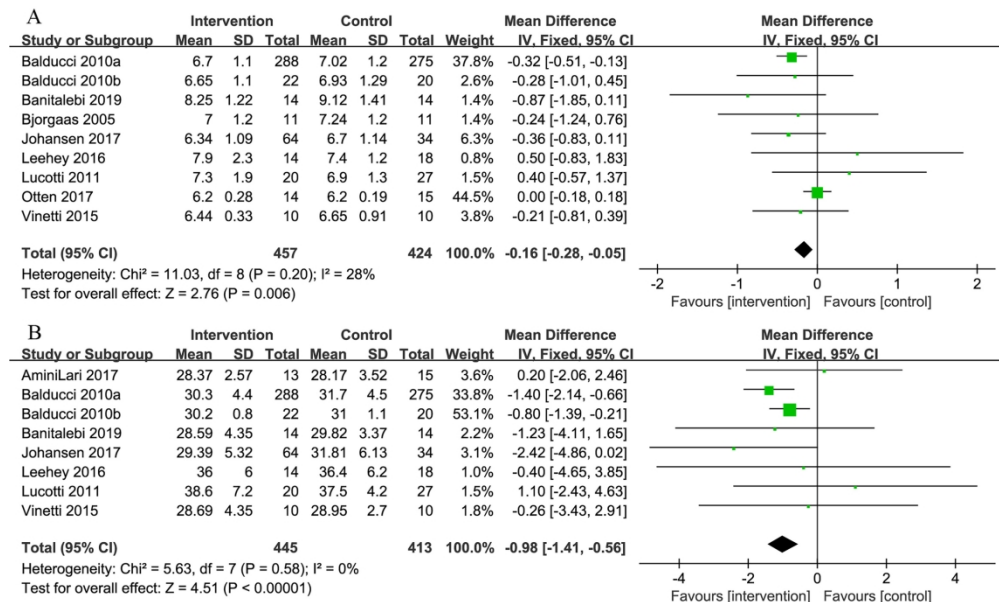

Figure 3 Comparison of HbA1c and body mass index (BMI) between intervention group and control group in patients with T2D and concurrent overweight/obesity. (A) Forest plot of HbA1c; (B) Forest plot of BMI; Unit of HbA1c is "%". Unit of BMI is "kg/m<sup>2</sup>".

195x119mm (300 x 300 DPI)

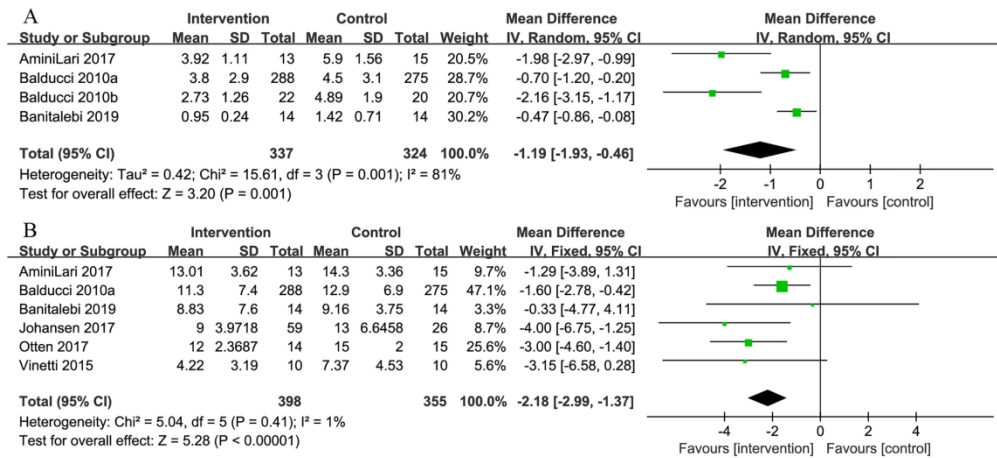

Figure 4 Comparison of homeostasis model assessment of insulin resistance (HOMA-IR) and serum insulin between intervention group and control group in patients with T2D and concurrent overweight/obesity. (A) Forest plot of HOMA-IR; (B) Forest plot of serum insulin. HOMA-IR has no units. Unit of serum insulin is “µIU/mL”.

195x89mm (300 x 300 DPI)



1  
2  
3  
4  
5  
6  
7  
8  
9  
10  
11  
12  
13  
14  
15  
16  
17  
18  
19  
20  
21  
22  
23  
24  
25  
26  
27  
28  
29  
30  
31  
32  
33  
34  
35  
36  
37  
38  
39  
40  
41  
42  
43  
44  
45  
46  
47  
48  
49  
50  
51  
52  
53  
54  
55  
56  
57  
58  
59  
60

Figure 5 Comparison of systolic blood pressure (SBP) and diastolic blood pressure (DBP) between intervention group and control group in patients with T2D and concurrent overweight/obesity. (A) Forest plot of SBP; (B) Forest plot of DBP. Units of SBP and DBP are both "mmHg".

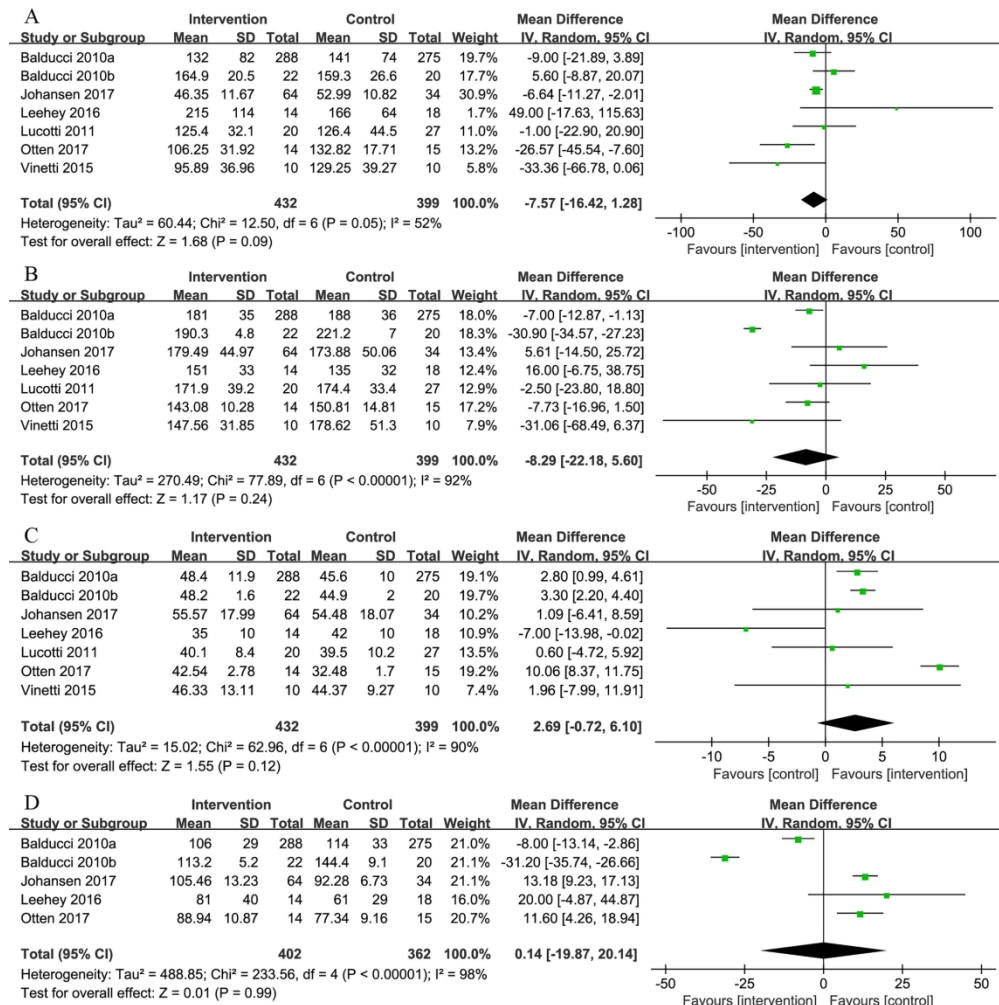

Figure 6 Comparison of triglycerides (TG), total cholesterol (TC), high-density lipoprotein cholesterol (HDL-C) and low-density lipoprotein cholesterol (LDL-C) between intervention group and control group in patients with T2D and concurrent overweight/obesity. (A) Forest plot of TG; (B) Forest plot of TC; (C) Forest plot of HDL-C; (D) Forest plot of LDL-C. Units of TG, TC, HDL-C and LDL-C are "mg/dL".

195x197mm (300 x 300 DPI)

**PubMed**

- 1
- 2
- 3
- 4
- 5 #1 Physical activity[Text Word]
- 6
- 7 #2 Physical intervention[Text Word]
- 8
- 9 #3 Exercise [MeSH Terms]
- 10
- 11 #4 Train\*[Text Word]
- 12
- 13 #5 Aerobic[Text Word]
- 14
- 15 #6 Isometric[Text Word]
- 16
- 17 #7 Resistance[Text Word]
- 18
- 19 #8 Strength\*[Text Word]
- 20
- 21 #9 Weight Lifting[Text Word]
- 22
- 23 #10 Weight Bearing[Text Word]
- 24
- 25 #11 Exercise[Text Word]
- 26
- 27 #12 Physical exercise[Text Word]
- 28
- 29 #13 Combined exercise[Text Word]
- 30
- 31 #14 Overweight[MeSH Terms]
- 32
- 33 #15 Overweight[Text Word]
- 34
- 35 #16 Obesity[MeSH Terms]
- 36
- 37 #17 Obes\*[Text Word]
- 38
- 39 #18 Body mass index[Text Word]
- 40
- 41 #19 BMI[Text Word]
- 42
- 43 #20 Body weight[Text Word]
- 44
- 45 #21 Underweight[Text Word]
- 46
- 47 #22 Adiposity[Text Word]
- 48
- 49 #23 Body fat distribution[Text Word]
- 50
- 51 #24 Quetelet index[Text Word]
- 52
- 53 #25 Diabetes[Title/Abstract]
- 54
- 55 #26 Diabet\*[Text Word]
- 56
- 57 #27 DM[Text Word]
- 58
- 59 #28 T2DM[Text Word]
- 60
- #29 T2D[Text Word]
- #30 NIDDM[Text Word]
- #31 #1-13/OR
- #32 #14-24/OR
- #33 #25-30/OR
- #34 #31 AND #32 AND #33

**EMBASE**

- #1 `Physical activity':ti,ab,kw
- #2 `Physical intervention':ti,ab,kw
- #3 `Exercise':ti,ab,kw
- #4 `Exercise'/exp
- #5 `Train':ti,ab,kw
- #6 `Training':ti,ab,kw
- #7 `Aerobic':ti,ab,kw
- #8 `Resistance':ti,ab,kw
- #9 `Strength':ti,ab,kw
- #10 `Weight Lifting':ti,ab,kw
- #11 `Weight Bearing':ti,ab,kw
- #12 `Physical exercise':ti,ab,kw
- #13 `Combined exercise':ti,ab,kw
- #14 `Overweight'/exp
- #15 `Overweight':ti,ab,kw
- #16 `Obesity'/exp
- #17 `Obese':ti,ab,kw
- #18 `Obesity':ti,ab,kw
- #19 `Body mass index':ti,ab,kw
- #20 `BMI':ti,ab,kw
- #21 `Body weight':ti,ab,kw
- #22 `Underweight':ti,ab,kw
- #23 `Adiposity':ti,ab,kw
- #24 `Body fat distribution':ti,ab,kw
- #25 `Quetelet index':ti,ab,kw
- #26 `Diabetes':ti,ab,kw
- #27 `Diabetic':ti,ab,kw
- #28 `DM':ti,ab,kw
- #29 `T2DM':ti,ab,kw
- #30 `T2D':ti,ab,kw
- #31 `NIDDM':ti,ab,kw
- #32 #1-13/OR
- #33 #14-25/OR
- #34 #26-31/OR

1  
2  
3 #35 #32 AND #33 AND #34

4  
5 Limits: Human, English language

6  
7  
8 **Web of Science**

9  
10 #1 TS=(Physical activity OR Physical intervention OR Exercise OR Train\* OR Aerobic  
11 OR Isometric OR Resistance OR Strength\* OR Weight Lifting OR Weight Bearing OR  
12 Physical exercise OR Combined exercise)

13  
14 #2 TS=(Overweight OR Obes\* OR Body mass index OR BMI OR Body weight OR  
15 Underweight OR Adiposity OR Body fat distribution OR Quetelet index)

16  
17 #3 TS=(Diabetes OR Diabetic OR DM OR T2DM OR T2D OR NIDDM)

18  
19 #4 (#1 AND #2 AND #3) AND LANGUAGE: (English)

20  
21  
22  
23 **the Cochrane library**

24  
25 #1 "Physical activity":ti,ab,kw

26  
27 #2 "Physical intervention":ti,ab,kw

28  
29 #3 "Exercise":ti,ab,kw

30  
31 #4 "Train":ti,ab,kw

32  
33 #5 "Training":ti,ab,kw

34  
35 #6 "Aerobic":ti,ab,kw

36  
37 #7 "Isometric":ti,ab,kw

38  
39 #8 "Resistance":ti,ab,kw

40  
41 #9 "Strength":ti,ab,kw

42  
43 #10 "Weight Lifting":ti,ab,kw

44  
45 #11 "Weight Bearing":ti,ab,kw

46  
47 #12 "Physical exercise":ti,ab,kw

48  
49 #13 "Combined exercise":ti,ab,kw

50  
51 #14 "Overweight":ti,ab,kw

52  
53 #15 "Obese":ti,ab,kw

54  
55 #16 "Obesity":ti,ab,kw

56  
57 #17 "Body mass index":ti,ab,kw

58  
59 #18 "BMI":ti,ab,kw

60  
#19 "Body weight":ti,ab,kw

#20 "Underweight":ti,ab,kw

#21 "Adiposity":ti,ab,kw

#22 "Body fat distribution":ti,ab,kw

1  
2  
3  
4 #23 "Quetelet index":ti,ab,kw

5 #24 "Diabetes":ti,ab,kw

6  
7 #25 "Diabetic":ti,ab,kw

8 #26 "DM":ti,ab,kw

9  
10 #27 "T2DM":ti,ab,kw

11 #28 "T2D":ti,ab,kw

12  
13 #29 "NIDDM":ti,ab,kw

14  
15 #30 #1-13/OR

16 #31 #14-23/OR

17  
18 #32 #24-29/OR

19  
20 #33 #30 AND #31 AND #32

## 21 22 23 **WANFANG**

24 #1 "运动"[主题]

25 #2 "体育"[主题]

26 #3 "需氧运动"[主题]

27 #4 "等距离运动"[主题]

28 #5 "等长运动"[主题]

29 #6 "有氧运动"[主题]

30 #7 "锻炼"[主题]

31 #8 "训练"[主题]

32 #9 "抗阻力"[主题]

33 #10 "抗阻"[主题]

34 #11 "力量"[主题]

35 #12 "联合运动"[主题]

36 #13 "营养障碍"[主题]

37 #14 "营养过剩"[主题]

38 #15 "肥胖症"[主题]

39 #16 "肥胖"[主题]

40 #17 "超重"[主题]

41 #18 "体重"[主题]

42 #19 "人体质量指数"[主题]

43 #20 "体质指数"[主题]

44 #21 " BMI "[主题]

45 #22 "2 型糖尿病"[主题]

46 #23 "糖尿病"[主题]

47 #24 "非胰岛素依赖型糖尿病"[主题]

48 #25 #1-12/OR

49 #26 #13-21/OR

50 #27 #22-24/OR

1  
2  
3 #28 #25 AND #26 AND #27  
4  
5

6  
7 **CNKI**

8 #1 "运动"[主题]  
9 #2 "体育"[主题]  
10 #3 "需氧运动"[主题]  
11 #4 "等距离运动"[主题]  
12 #5 "等长运动"[主题]  
13 #6 "有氧运动"[主题]  
14 #7 "锻炼"[主题]  
15 #8 "训练"[主题]  
16 #9 "抗阻力"[主题]  
17 #10 "抗阻"[主题]  
18 #11 "力量"[主题]  
19 #12 "联合运动"[主题]  
20 #13 "营养障碍"[主题]  
21 #14 "营养过剩"[主题]  
22 #15 "肥胖症"[主题]  
23 #16 "肥胖"[主题]  
24 #17 "超重"[主题]  
25 #18 "体重"[主题]  
26 #19 "人体质量指数"[主题]  
27 #20 "体质指数"[主题]  
28 #21 " BMI "[主题]  
29 #22 "2 型糖尿病"[主题]  
30 #23 "糖尿病"[主题]  
31 #24 "非胰岛素依赖型糖尿病"[主题]  
32 #25 #1-12/OR  
33 #26 #13-21/OR  
34 #27 #22-24/OR  
35 #28 #25 AND #26 AND #27  
36  
37  
38  
39  
40  
41  
42  
43  
44  
45  
46  
47

48 **SinoMed**

49 #1 "运动"[常用字段:智能]  
50 #2 "体育"[常用字段:智能]  
51 #3 "需氧运动"[常用字段:智能]  
52 #4 "等距离运动"[常用字段:智能]  
53 #5 "等长运动"[常用字段:智能]  
54 #6 "有氧运动"[常用字段:智能]  
55 #7 "锻炼"[常用字段:智能]  
56 #8 "训练"[常用字段:智能]  
57 #9 "抗阻力"[常用字段:智能]  
58  
59  
60

- 1  
2  
3 #10 "抗阻"[常用字段:智能]  
4 #11 "力量"[常用字段:智能]  
5 #12 "联合运动"[常用字段:智能]  
6 #13 "营养障碍"[常用字段:智能]  
7 #14 "营养过剩"[常用字段:智能]  
8 #15 "肥胖症"[常用字段:智能]  
9 #16 "肥胖"[常用字段:智能]  
10 #17 "超重"[常用字段:智能]  
11 #18 "体重"[常用字段:智能]  
12 #19 "人体质量指数"[常用字段:智能]  
13 #20 "体质指数"[常用字段:智能]  
14 #21 " BMI "[常用字段:智能]  
15 #22 "2 型糖尿病"[常用字段:智能]  
16 #23 "糖尿病"[常用字段:智能]  
17 #24 "非胰岛素依赖型糖尿病"[常用字段:智能]  
18 #25 #1-12/OR  
19 #26 #13-21/OR  
20 #27 #22-24/OR  
21 #28 #25 AND #26 AND #27  
22  
23  
24  
25  
26  
27  
28  
29  
30

### OpenGrey

((Diabetes OR Diabetic OR DM OR T2DM OR T2D OR NIDDM) AND (Overweight OR  
Obes\* OR Body mass index OR BMI OR Body weight OR Underweight OR Adiposity OR  
Body fat distribution OR Quetelet index)) AND (Physical activity OR Physical  
intervention OR Exercise OR Train\* OR Aerobic OR Isometric OR Resistance OR  
Strength\* OR Weight Lifting OR Weight Bearing OR Physical exercise OR Combined  
exercise)

### ClinicalTrials.gov

Condition or disease: (Diabetes OR Diabetic OR DM OR T2DM OR T2D OR NIDDM) AND  
(Overweight OR Obesity OR obese)

Other terms: Physical activity OR Physical intervention OR Exercise OR Train\* OR  
Aerobic OR Isometric OR Resistance OR Strength\* OR Weight Lifting OR Weight Bearing  
OR Physical exercise OR Combined exercise

Study type: Interventional Studies (Clinical Trials)

Study Results: Studies With Results



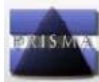

## PRISMA 2020 Checklist

| Section and Topic             | Item # | Checklist item                                                                                                                                                                                                                                                                                       | Location where item is reported |
|-------------------------------|--------|------------------------------------------------------------------------------------------------------------------------------------------------------------------------------------------------------------------------------------------------------------------------------------------------------|---------------------------------|
| <b>TITLE</b>                  |        |                                                                                                                                                                                                                                                                                                      |                                 |
| Title                         | 1      | Identify the report as a systematic review.                                                                                                                                                                                                                                                          | P2L12                           |
| <b>ABSTRACT</b>               |        |                                                                                                                                                                                                                                                                                                      |                                 |
| Abstract                      | 2      | See the PRISMA 2020 for Abstracts checklist.                                                                                                                                                                                                                                                         |                                 |
| <b>INTRODUCTION</b>           |        |                                                                                                                                                                                                                                                                                                      |                                 |
| Rationale                     | 3      | Describe the rationale for the review in the context of existing knowledge.                                                                                                                                                                                                                          | P5L33-41                        |
| Objectives                    | 4      | Provide an explicit statement of the objective(s) or question(s) the review addresses.                                                                                                                                                                                                               | P5L53-56                        |
| <b>METHODS</b>                |        |                                                                                                                                                                                                                                                                                                      |                                 |
| Eligibility criteria          | 5      | Specify the inclusion and exclusion criteria for the review and how studies were grouped for the syntheses.                                                                                                                                                                                          | P6-7                            |
| Information sources           | 6      | Specify all databases, registers, websites, organisations, reference lists and other sources searched or consulted to identify studies. Specify the date when each source was last searched or consulted.                                                                                            | P7L45-50                        |
| Search strategy               | 7      | Present the full search strategies for all databases, registers and websites, including any filters and limits used.                                                                                                                                                                                 | Appendix                        |
| Selection process             | 8      | Specify the methods used to decide whether a study met the inclusion criteria of the review, including how many reviewers screened each record and each report retrieved, whether they worked independently, and if applicable, details of automation tools used in the process.                     | P8L12-28                        |
| Data collection process       | 9      | Specify the methods used to collect data from reports, including how many reviewers collected data from each report, whether they worked independently, any processes for obtaining or confirming data from study investigators, and if applicable, details of automation tools used in the process. | P8L35-45                        |
| Data items                    | 10a    | List and define all outcomes for which data were sought. Specify whether all results that were compatible with each outcome domain in each study were sought (e.g. for all measures, time points, analyses), and if not, the methods used to decide which results to collect.                        | P8L38-40<br>Table 1             |
|                               | 10b    | List and define all other variables for which data were sought (e.g. participant and intervention characteristics, funding sources). Describe any assumptions made about any missing or unclear information.                                                                                         | Table 1                         |
| Study risk of bias assessment | 11     | Specify the methods used to assess risk of bias in the included studies, including details of the tool(s) used, how many reviewers assessed each study and whether they worked independently, and if applicable, details of automation tools used in the process.                                    | P8L51-55                        |
| Effect measures               | 12     | Specify for each outcome the effect measure(s) (e.g. risk ratio, mean difference) used in the synthesis or presentation of results.                                                                                                                                                                  | P9L17-20                        |
| Synthesis methods             | 13a    | Describe the processes used to decide which studies were eligible for each synthesis (e.g. tabulating the study intervention characteristics and comparing against the planned groups for each synthesis (item #5)).                                                                                 | P9L6                            |
|                               | 13b    | Describe any methods required to prepare the data for presentation or synthesis, such as handling of missing summary statistics, or data conversions.                                                                                                                                                | NA                              |
|                               | 13c    | Describe any methods used to tabulate or visually display results of individual studies and syntheses.                                                                                                                                                                                               | P9L7-9                          |
|                               | 13d    | Describe any methods used to synthesize results and provide a rationale for the choice(s). If meta-analysis was performed, describe the model(s), method(s) to identify the presence and extent of statistical heterogeneity, and software package(s) used.                                          | P9L7-14                         |
|                               | 13e    | Describe any methods used to explore possible causes of heterogeneity among study results (e.g. subgroup analysis, meta-regression).                                                                                                                                                                 | P9L14-16                        |
|                               | 13f    | Describe any sensitivity analyses conducted to assess robustness of the synthesized results.                                                                                                                                                                                                         | NA                              |
| Reporting bias assessment     | 14     | Describe any methods used to assess risk of bias due to missing results in a synthesis (arising from reporting biases).                                                                                                                                                                              | NA                              |
| Certainty                     | 15     | Describe any methods used to assess certainty (or confidence) in the body of evidence for an outcome.                                                                                                                                                                                                | P9L17-20                        |

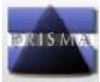

## PRISMA 2020 Checklist

| Section and Topic                              | Item # | Checklist item                                                                                                                                                                                                                                                                       | Location where item is reported |
|------------------------------------------------|--------|--------------------------------------------------------------------------------------------------------------------------------------------------------------------------------------------------------------------------------------------------------------------------------------|---------------------------------|
| assessment                                     |        |                                                                                                                                                                                                                                                                                      |                                 |
| <b>RESULTS</b>                                 |        |                                                                                                                                                                                                                                                                                      |                                 |
| Study selection                                | 16a    | Describe the results of the search and selection process, from the number of records identified in the search to the number of studies included in the review, ideally using a flow diagram.                                                                                         | P9L38-42<br>Figure 1            |
|                                                | 16b    | Cite studies that might appear to meet the inclusion criteria, but which were excluded, and explain why they were excluded.                                                                                                                                                          | P20L48                          |
| Study characteristics                          | 17     | Cite each included study and present its characteristics.                                                                                                                                                                                                                            | P13L9-12<br>Table 1             |
| Risk of bias in studies                        | 18     | Present assessments of risk of bias for each included study.                                                                                                                                                                                                                         | P13L7-20<br>Figure 2            |
| Results of individual studies                  | 19     | For all outcomes, present, for each study: (a) summary statistics for each group (where appropriate) and (b) an effect estimate and its precision (e.g. confidence/credible interval), ideally using structured tables or plots.                                                     | Figure 3-6                      |
| Results of syntheses                           | 20a    | For each synthesis, briefly summarise the characteristics and risk of bias among contributing studies.                                                                                                                                                                               | P9, P13                         |
|                                                | 20b    | Present results of all statistical syntheses conducted. If meta-analysis was done, present for each the summary estimate and its precision (e.g. confidence/credible interval) and measures of statistical heterogeneity. If comparing groups, describe the direction of the effect. | P13-14                          |
|                                                | 20c    | Present results of all investigations of possible causes of heterogeneity among study results.                                                                                                                                                                                       | P13L12-17                       |
|                                                | 20d    | Present results of all sensitivity analyses conducted to assess the robustness of the synthesized results.                                                                                                                                                                           | NA                              |
| Reporting biases                               | 21     | Present assessments of risk of bias due to missing results (arising from reporting biases) for each synthesis assessed.                                                                                                                                                              | NA                              |
| Certainty of evidence                          | 22     | Present assessments of certainty (or confidence) in the body of evidence for each outcome assessed.                                                                                                                                                                                  | P13L17-19                       |
| <b>DISCUSSION</b>                              |        |                                                                                                                                                                                                                                                                                      |                                 |
| Discussion                                     | 23a    | Provide a general interpretation of the results in the context of other evidence.                                                                                                                                                                                                    | P16L8-18                        |
|                                                | 23b    | Discuss any limitations of the evidence included in the review.                                                                                                                                                                                                                      | P19, P20                        |
|                                                | 23c    | Discuss any limitations of the review processes used.                                                                                                                                                                                                                                | P20                             |
|                                                | 23d    | Discuss implications of the results for practice, policy, and future research.                                                                                                                                                                                                       | P19                             |
| <b>OTHER INFORMATION</b>                       |        |                                                                                                                                                                                                                                                                                      |                                 |
| Registration and protocol                      | 24a    | Provide registration information for the review, including register name and registration number, or state that the review was not registered.                                                                                                                                       | Not registered                  |
|                                                | 24b    | Indicate where the review protocol can be accessed, or state that a protocol was not prepared.                                                                                                                                                                                       | Not prepared                    |
|                                                | 24c    | Describe and explain any amendments to information provided at registration or in the protocol.                                                                                                                                                                                      | NA                              |
| Support                                        | 25     | Describe sources of financial or non-financial support for the review, and the role of the funders or sponsors in the review.                                                                                                                                                        | P21L51-55                       |
| Competing interests                            | 26     | Declare any competing interests of review authors.                                                                                                                                                                                                                                   | P21L56                          |
| Availability of data, code and other materials | 27     | Report which of the following are publicly available and where they can be found: template data collection forms; data extracted from included studies; data used for all analyses; analytic code; any other materials used in the review.                                           | Table 1, Appendix               |

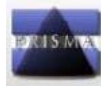

## PRISMA 2020 Checklist

### PRISMA Abstract Checklist

| Topic                          | No. | Item                                                                                                                                                                                                                                                                                                  | Reported? |
|--------------------------------|-----|-------------------------------------------------------------------------------------------------------------------------------------------------------------------------------------------------------------------------------------------------------------------------------------------------------|-----------|
| <b>TITLE</b>                   |     |                                                                                                                                                                                                                                                                                                       |           |
| <b>Title</b>                   | 1   | Identify the report as a systematic review.                                                                                                                                                                                                                                                           | Yes       |
| <b>BACKGROUND</b>              |     |                                                                                                                                                                                                                                                                                                       |           |
| <b>Objectives</b>              | 2   | Provide an explicit statement of the main objective(s) or question(s) the review addresses.                                                                                                                                                                                                           | Yes       |
| <b>METHODS</b>                 |     |                                                                                                                                                                                                                                                                                                       |           |
| <b>Eligibility criteria</b>    | 3   | Specify the inclusion and exclusion criteria for the review.                                                                                                                                                                                                                                          | No        |
| <b>Information sources</b>     | 4   | Specify the information sources (e.g. databases, registers) used to identify studies and the date when each was last searched.                                                                                                                                                                        | Yes       |
| <b>Risk of bias</b>            | 5   | Specify the methods used to assess risk of bias in the included studies.                                                                                                                                                                                                                              | Yes       |
| <b>Synthesis of results</b>    | 6   | Specify the methods used to present and synthesize results.                                                                                                                                                                                                                                           | Yes       |
| <b>RESULTS</b>                 |     |                                                                                                                                                                                                                                                                                                       |           |
| <b>Included studies</b>        | 7   | Give the total number of included studies and participants and summarise relevant characteristics of studies.                                                                                                                                                                                         | Yes       |
| <b>Synthesis of results</b>    | 8   | Present results for main outcomes, preferably indicating the number of included studies and participants for each. If meta-analysis was done, report the summary estimate and confidence/credible interval. If comparing groups, indicate the direction of the effect (i.e. which group is favoured). | Yes       |
| <b>DISCUSSION</b>              |     |                                                                                                                                                                                                                                                                                                       |           |
| <b>Limitations of evidence</b> | 9   | Provide a brief summary of the limitations of the evidence included in the review (e.g. study risk of bias, inconsistency and imprecision).                                                                                                                                                           | Yes       |
| <b>Interpretation</b>          | 10  | Provide a general interpretation of the results and important implications.                                                                                                                                                                                                                           | Yes       |
| <b>OTHER</b>                   |     |                                                                                                                                                                                                                                                                                                       |           |
| <b>Funding</b>                 | 11  | Specify the primary source of funding for the review.                                                                                                                                                                                                                                                 | No        |
| <b>Registration</b>            | 12  | Provide the register name and registration number.                                                                                                                                                                                                                                                    | No        |
