# Supplementary material for: Effectiveness of combined exercise in people with type 2 diabetes and concurrent overweight/obesity: a systematic review and meta-analysis
Source: PubMed Central journal article supplement — BMJ Open. 2021 Oct 6;11(10):e046252. doi: 10.1136/bmjopen-2020-046252 (PMC8496382; doi:10.1136/bmjopen-2020-046252), 2021-10-06
Supplement: bmjopen-2020-046252supp001.pdf [file bmjopen-2020-046252supp001.pdf]

**PubMed**

- #1 Physical activity[Text Word]
- #2 Physical intervention[Text Word]
- #3 Exercise [MeSH Terms]
- #4 Train\*[Text Word]
- #5 Aerobic[Text Word]
- #6 Isometric[Text Word]
- #7 Resistance[Text Word]
- #8 Strength\*[Text Word]
- #9 Weight Lifting[Text Word]
- #10 Weight Bearing[Text Word]
- #11 Exercise[Text Word]
- #12 Physical exercise[Text Word]
- #13 Combined exercise[Text Word]
- #14 Overweight[MeSH Terms]
- #15 Overweight[Text Word]
- #16 Obesity[MeSH Terms]
- #17 Obes\*[Text Word]
- #18 Body mass index[Text Word]
- #19 BMI[Text Word]
- #20 Body weight[Text Word]
- #21 Underweight[Text Word]
- #22 Adiposity[Text Word]
- #23 Body fat distribution[Text Word]
- #24 Quetelet index[Text Word]
- #25 Diabetes[Title/Abstract]
- #26 Diabet\*[Text Word]
- #27 DM[Text Word]
- #28 T2DM[Text Word]
- #29 T2D[Text Word]
- #30 NIDDM[Text Word]
- #31 #1-13/OR
- #32 #14-24/OR
- #33 #25-30/OR
- #34 #31 AND #32 AND #33

**EMBASE**

- #1 'Physical activity':ti,ab,kw
- #2 'Physical intervention':ti,ab,kw
- #3 'Exercise':ti,ab,kw
- #4 'Exercise'/exp
- #5 'Train':ti,ab,kw
- #6 'Training':ti,ab,kw
- #7 'Aerobic':ti,ab,kw
- #8 'Resistance':ti,ab,kw
- #9 'Strength':ti,ab,kw
- #10 'Weight Lifting':ti,ab,kw
- #11 'Weight Bearing':ti,ab,kw
- #12 'Physical exercise':ti,ab,kw
- #13 'Combined exercise':ti,ab,kw
- #14 'Overweight'/exp
- #15 'Overweight':ti,ab,kw
- #16 'Obesity'/exp
- #17 'Obese':ti,ab,kw
- #18 'Obesity':ti,ab,kw
- #19 'Body mass index':ti,ab,kw
- #20 'BMI':ti,ab,kw
- #21 'Body weight':ti,ab,kw
- #22 'Underweight':ti,ab,kw
- #23 'Adiposity':ti,ab,kw
- #24 'Body fat distribution':ti,ab,kw
- #25 'Quetelet index':ti,ab,kw
- #26 'Diabetes':ti,ab,kw
- #27 'Diabetic':ti,ab,kw
- #28 'DM':ti,ab,kw
- #29 'T2DM':ti,ab,kw
- #30 'T2D':ti,ab,kw
- #31 'NIDDM':ti,ab,kw
- #32 #1-13/OR
- #33 #14-25/OR
- #34 #26-31/OR

#35 #32 AND #33 AND #34

Limits: Human, English language

### **Web of Science**

#1 TS=(Physical activity OR Physical intervention OR Exercise OR Train\* OR Aerobic OR Isometric OR Resistance OR Strength\* OR Weight Lifting OR Weight Bearing OR Physical exercise OR Combined exercise)

#2 TS=(Overweight OR Obes\* OR Body mass index OR BMI OR Body weight OR Underweight OR Adiposity OR Body fat distribution OR Quetelet index)

#3 TS=(Diabetes OR Diabetic OR DM OR T2DM OR T2D OR NIDDM)

#4 (#1 AND #2 AND #3) AND LANGUAGE: (English)

### **the Cochrane library**

#1 "Physical activity":ti,ab,kw

#2 "Physical intervention":ti,ab,kw

#3 "Exercise":ti,ab,kw

#4 "Train":ti,ab,kw

#5 "Training":ti,ab,kw

#6 "Aerobic":ti,ab,kw

#7 "Isometric":ti,ab,kw

#8 "Resistance":ti,ab,kw

#9 "Strength":ti,ab,kw

#10 "Weight Lifting":ti,ab,kw

#11 "Weight Bearing":ti,ab,kw

#12 "Physical exercise":ti,ab,kw

#13 "Combined exercise":ti,ab,kw

#14 "Overweight":ti,ab,kw

#15 "Obese":ti,ab,kw

#16 "Obesity":ti,ab,kw

#17 "Body mass index":ti,ab,kw

#18 "BMI":ti,ab,kw

#19 "Body weight":ti,ab,kw

#20 "Underweight":ti,ab,kw

#21 "Adiposity":ti,ab,kw

#22 "Body fat distribution":ti,ab,kw

- #23 "Quetelet index":ti,ab,kw
- #24 "Diabetes":ti,ab,kw
- #25 "Diabetic":ti,ab,kw
- #26 "DM":ti,ab,kw
- #27 "T2DM":ti,ab,kw
- #28 "T2D":ti,ab,kw
- #29 "NIDDM":ti,ab,kw
- #30 #1-13/OR
- #31 #14-23/OR
- #32 #24-29/OR
- #33 #30 AND #31 AND #32

### **WANFANG**

- #1 "运动"[主题]
- #2 "体育"[主题]
- #3 "需氧运动"[主题]
- #4 "等距离运动"[主题]
- #5 "等长运动"[主题]
- #6 "有氧运动"[主题]
- #7 "锻炼"[主题]
- #8 "训练"[主题]
- #9 "抗阻力"[主题]
- #10 "抗阻"[主题]
- #11 "力量"[主题]
- #12 "联合运动"[主题]
- #13 "营养障碍"[主题]
- #14 "营养过剩"[主题]
- #15 "肥胖症"[主题]
- #16 "肥胖"[主题]
- #17 "超重"[主题]
- #18 "体重"[主题]
- #19 "人体质量指数"[主题]
- #20 "体质指数"[主题]
- #21 "BMI "[主题]
- #22 "2型糖尿病"[主题]
- #23 "糖尿病"[主题]
- #24 "非胰岛素依赖型糖尿病"[主题]
- #25 #1-12/OR
- #26 #13-21/OR
- #27 #22-24/OR

#28 #25 AND #26 AND #27

### CNKI

- #1 "运动"[主题]
- #2 "体育"[主题]
- #3 "需氧运动"[主题]
- #4 "等距离运动"[主题]
- #5 "等长运动"[主题]
- #6 "有氧运动"[主题]
- #7 "锻炼"[主题]
- #8 "训练"[主题]
- #9 "抗阻力"[主题]
- #10 "抗阻"[主题]
- #11 "力量"[主题]
- #12 "联合运动"[主题]
- #13 "营养障碍"[主题]
- #14 "营养过剩"[主题]
- #15 "肥胖症"[主题]
- #16 "肥胖"[主题]
- #17 "超重"[主题]
- #18 "体重"[主题]
- #19 "人体质量指数"[主题]
- #20 "体质指数"[主题]
- #21 " BMI "[主题]
- #22 "2 型糖尿病"[主题]
- #23 "糖尿病"[主题]
- #24 "非胰岛素依赖型糖尿病"[主题]
- #25 #1-12/OR
- #26 #13-21/OR
- #27 #22-24/OR
- #28 #25 AND #26 AND #27

### SinoMed

- #1 "运动"[常用字段:智能]
- #2 "体育"[常用字段:智能]
- #3 "需氧运动"[常用字段:智能]
- #4 "等距离运动"[常用字段:智能]
- #5 "等长运动"[常用字段:智能]
- #6 "有氧运动"[常用字段:智能]
- #7 "锻炼"[常用字段:智能]
- #8 "训练"[常用字段:智能]
- #9 "抗阻力"[常用字段:智能]

- #10 "抗阻"[常用字段:智能]
- #11 "力量"[常用字段:智能]
- #12 "联合运动"[常用字段:智能]
- #13 "营养障碍"[常用字段:智能]
- #14 "营养过剩"[常用字段:智能]
- #15 "肥胖症"[常用字段:智能]
- #16 "肥胖"[常用字段:智能]
- #17 "超重"[常用字段:智能]
- #18 "体重"[常用字段:智能]
- #19 "人体质量指数"[常用字段:智能]
- #20 "体质指数"[常用字段:智能]
- #21 " BMI "[常用字段:智能]
- #22 "2 型糖尿病"[常用字段:智能]
- #23 "糖尿病"[常用字段:智能]
- #24 "非胰岛素依赖型糖尿病"[常用字段:智能]
- #25 #1-12/OR
- #26 #13-21/OR
- #27 #22-24/OR
- #28 #25 AND #26 AND #27

### **OpenGrey**

((Diabetes OR Diabetic OR DM OR T2DM OR T2D OR NIDDM) AND (Overweight OR Obes\* OR Body mass index OR BMI OR Body weight OR Underweight OR Adiposity OR Body fat distribution OR Quetelet index)) AND (Physical activity OR Physical intervention OR Exercise OR Train\* OR Aerobic OR Isometric OR Resistance OR Strength\* OR Weight Lifting OR Weight Bearing OR Physical exercise OR Combined exercise)

### **ClinicalTrials.gov**

Condition or disease: (Diabetes OR Diabetic OR DM OR T2DM OR T2D OR NIDDM) AND (Overweight OR Obesity OR obese)

Other terms: Physical activity OR Physical intervention OR Exercise OR Train\* OR Aerobic OR Isometric OR Resistance OR Strength\* OR Weight Lifting OR Weight Bearing OR Physical exercise OR Combined exercise

Study type: Interventional Studies (Clinical Trials)

Study Results: Studies With Results
